1 **Inter- and intra-domain functional redundancy in the rumen microbiome**  
2 **during plant biomass degradation**

3 Andrea Söllinger<sup>1,2\*</sup>, Alexander Tøsdal Tveit<sup>3</sup>, Morten Poulsen<sup>4</sup>, Samantha Joan Noel<sup>4</sup>, Mia  
4 Bengtsson<sup>2</sup>, Jörg Bernhardt<sup>2</sup>, Anne Louise Frydendahl Hellwing<sup>4</sup>, Peter Lund<sup>4</sup>, Katharina Riedel<sup>2</sup>,  
5 Christa Schleper<sup>1</sup>, Ole Højberg<sup>4</sup>, Tim Urich<sup>2\*</sup>

6

7 <sup>1</sup> Department of Ecogenomics and Systems Biology, University of Vienna, Althanstraße 14, 1090 Vienna, Austria

8 <sup>2</sup> Institute of Microbiology, University of Greifswald, Felix-Hausdorff-Straße 8, 17487 Greifswald, Germany

9 <sup>3</sup> Department of Arctic and Marine Biology, UiT, The Arctic University of Norway, Hansine Hansens veg 18, 9019  
10 Tromsø, Norway

11 <sup>4</sup> Department of Animal Science, Aarhus University, Blichers Alle 20, 8830 Tjele, Denmark

12

13 \*corresponding author, Institute of Microbiology, Felix-Hausdorff-Straße 8, 17487 Greifswald, Germany; Tel.:  
14 +49 (0)3834 420 5904; E-Mail: [tim.urich@uni-greifswald.de](mailto:tim.urich@uni-greifswald.de)

15

16 **Email addresses.** Andrea Söllinger, [andrea.soellinger@univie.ac.at](mailto:andrea.soellinger@univie.ac.at); Alexander Tøsdal Tveit,  
17 [alexander.t.tveit@uit.no](mailto:alexander.t.tveit@uit.no); Morten Poulsen, [mpou@teknologisk.dk](mailto:mpou@teknologisk.dk); Samantha Joan Noel,  
18 [samantha.noel@anis.au.dk](mailto:samantha.noel@anis.au.dk); Mia Bengtsson, [mia.bengtsson@uni-greifswald.de](mailto:mia.bengtsson@uni-greifswald.de); Jörg Bernhardt,  
19 [Joerg.Bernhardt@uni-greifswald.de](mailto:Joerg.Bernhardt@uni-greifswald.de); Anne Louise Hellwing, [annelouise.hellwing@anis.au.dk](mailto:annelouise.hellwing@anis.au.dk); Peter Lund,  
20 [peter.lund@anis.au.dk](mailto:peter.lund@anis.au.dk); Katharina Riedel, [riedela@uni-greifswald.de](mailto:riedela@uni-greifswald.de); Christa Schleper,  
21 [christa.schleper@univie.ac.at](mailto:christa.schleper@univie.ac.at); Ole Højberg, [ole.hojberg@anis.au.dk](mailto:ole.hojberg@anis.au.dk); Tim Urich, [tim.urich@uni-greifswald.de](mailto:tim.urich@uni-greifswald.de)

22

23 **Abstract**

24 **Background:** Ruminant livestock is a major source of the potent greenhouse gas methane (CH<sub>4</sub>),  
25 produced by the complex rumen microbiome. Using an integrated approach, combining quantitative  
26 metatranscriptomics with gas- and volatile fatty acid (VFA) profiling, we gained fundamental insights  
27 into temporal dynamics of the cow rumen microbiome during feed degradation.

28 **Results:** The microbiome composition was highly individual and remarkably stable within each cow,  
29 despite similar gas emission and VFA profiles between cows. Gene expression profiles revealed a fast  
30 microbial growth response to feeding, reflected by drastic increases in microbial biomass, CH<sub>4</sub>  
31 emissions and VFA concentrations. Microbiome individuality was accompanied by high inter- and  
32 intra-domain functional redundancy among pro- and eukaryotic microbiome members in the key  
33 steps of anaerobic feed degradation. Methyl-reducing but not CO<sub>2</sub>-reducing methanogens were  
34 correlated with increased CH<sub>4</sub> emissions during plant biomass degradation.

35 **Conclusions:** The major response of the rumen microbiome to feed intake was a general growth of  
36 the whole community. The high functional redundancy of the cow-individual microbiomes was  
37 possibly linked to the robust performance of the anaerobic degradation process. Furthermore, the  
38 strong response of methylotrophic methanogens is suggesting that they might play a more important  
39 role in ruminant CH<sub>4</sub> emissions than previously assumed, making them potential targets for CH<sub>4</sub>  
40 mitigation strategies.

41

42 **Keywords:** metatranscriptomics, methane, rumen, microbiome, carbohydrate active enzymes,  
43 volatile fatty acids, methanogenesis, archaea, *Methanomassiliicoccales*

## 44 **Background**

45 Ruminant animals are the dominant large herbivores on Earth. Their evolutionary success is partly  
46 due to their tight symbiotic associations with commensal microorganisms (their microbiome) that  
47 enables them to utilise otherwise indigestible plant biomass as food sources [1]. Since their  
48 domestication in the Holocene, ruminants, in particular cows, have provided humankind with various  
49 important goods. However, agricultural farming of cows is also a major source of the potent  
50 greenhouse gas (GHG) methane (CH<sub>4</sub>), having a global warming potential 28 times higher than carbon  
51 dioxide [2].

52 Cows possess a complex digestive system including a four-compartment stomach, with the largest  
53 compartment being the rumen [3], a big anaerobic fermentation chamber harbouring the complex  
54 microbiome responsible for the anaerobic degradation of ingested plant biomass. During microbial  
55 hydrolysis and fermentation of plant fibres volatile fatty acids (VFA) are produced, which serve as the  
56 main energy source of the animal [4]. A prominent end-product of microbial degradation is CH<sub>4</sub>,  
57 produced by methanogenic Archaea. Individual cows, respectively their symbiotic methanogens,  
58 produce up to 500 L of CH<sub>4</sub> per day [5], making ruminant livestock one major anthropogenic CH<sub>4</sub>  
59 source [6]. Due to an increasing human world population, milk and meat demands are expected to  
60 double by 2050 [7], making the development of sustainable and productive animal farming systems a  
61 major challenge in agriculture [8]. CH<sub>4</sub> mitigation strategies are not only of ecological, but also of  
62 economic importance as ruminant CH<sub>4</sub> emissions represent an energy loss of 2 – 12 % for the animal  
63 [5, 8].

64 Since the times of the pioneering work of Hungate and others [9, 10, 11, 12], microbiologists have  
65 made large efforts to understand the structure-function relationships in the complex rumen  
66 microbiome, identifying the microorganisms that participate in certain steps of the anaerobic  
67 degradation pathway. More recently, the application of cultivation-independent molecular  
68 techniques has helped to uncover the high diversity of bacteria, archaea and eukaryotes residing in  
69 the rumen and factors affecting community composition (e.g. [13]). In addition, the usage of meta-

70 omics techniques has paved the way for a better understanding of the rumen ecosystem and the  
71 microbial metabolic potential and activity in the rumen (reviewed by [14]). These studies have  
72 revealed differences in rumen microbiome structure between low and high CH<sub>4</sub> emitting cows (e.g.  
73 [15, 16]) and the effects of different diets on ruminant CH<sub>4</sub> emissions (e.g. [17, 18, 19]). New insights  
74 were also gained by identification of new members of functional groups e.g. new fibrolytic and  
75 methanogenic community members [20, 21, 22, 23, 24]. Furthermore, the importance of diurnal  
76 microbiome dynamics for the understanding of VFA, H<sub>2</sub> and CH<sub>4</sub> production in the rumen was  
77 pointed out recently [25].

78 Despite these major advances, a holistic understanding of the rumen microbiome is still lacking,  
79 including answers to rather simple questions such as "who is doing what and when during feed  
80 degradation?". Such a fundamental understanding of the rumen ecosystem, as it was proposed by  
81 Hungate already in the early 1960s [11], can help to specifically manipulate the rumen microbiome,  
82 to lower CH<sub>4</sub> emissions, without hampering animal productivity, milk and meat quality or being  
83 harmful to the animal [14, 26].

84 To obtain a more comprehensive view on the activity of the rumen microbiome during plant biomass  
85 degradation, we performed a longitudinal metatranscriptomics study of microbiome dynamics in  
86 lactating cows. We aimed at identifying the active pro- and eukaryotic microbiome members and  
87 define their function in the key steps of anaerobic polysaccharide degradation and CH<sub>4</sub> production.

88 We hypothesized that the microbiome exhibits a defined successional pattern, reflecting a cascade of  
89 hydrolytic, fermentative and methanogenic steps, accompanied by distinct VFA and gas emission  
90 patterns. Based on a previous metatranscriptomic study from our lab [24] and work of others ([27]  
91 and references therein), we hypothesized that the recently discovered *Methanomassiliicoccales* are  
92 substantial contributors to ruminant CH<sub>4</sub> emissions and will therefore show high activity after  
93 ruminant feed intake.

94 Quantitative metatranscriptomics combined with gas- and VFA profiling enabled linking rumen  
95 microorganisms and their transcript profiles to processes. We show extensive inter- and intra-

96 domain functional redundancy among microorganisms at several steps of the anaerobic degradation  
97 pathway.

98

## 99 **Results**

100 **Temporal dynamics of feed digestion.** To investigate the effect of feed intake on CH<sub>4</sub> production by  
101 the rumen microbiome we conducted a diurnal feeding experiment over four days and measured  
102 CH<sub>4</sub>, CO<sub>2</sub> and H<sub>2</sub> emissions of four individual lactating Holstein cows on day four in open circuit  
103 respiration chambers (Fig. 1, Supplementary Table S1 and S2). Immediately after the morning  
104 feeding, CH<sub>4</sub> and CO<sub>2</sub> emissions approximately doubled ( $23.4 \pm 2.2 \text{ L h}^{-1} \text{ CH}_4$  and  $296.3 \pm 11.0 \text{ L CO}_2 \text{ h}^{-1}$ )  
105 with all animals showing similar dynamics and magnitude of gas production (Fig. 1b). The emissions  
106 dropped to before-feeding levels four to six hours after feed intake. H<sub>2</sub> was only detectable during  
107 the first hour after feeding started (Fig. 1b) indicative of highly active H<sub>2</sub>-producing primary and  
108 secondary fermenters providing excessive substrate for hydrogenotrophic methanogens. Similar  
109 dynamics in gas emissions were observed during afternoon feeding (Supplementary Figure S1).  
110 Likewise, the concentration of VFA in rumen fluid samples increased with peak concentrations  
111 measured three and two hours after start of the morning and the afternoon feeding, respectively  
112 (Fig. 1c), similar to [25]. However, compared to the gas emission profiles VFA pools were more  
113 variable in terms of magnitude and temporal dynamics between the four cows. The immediate  
114 accumulation of the fermentation products H<sub>2</sub>, CO<sub>2</sub> (i.e. substrates for methanogenesis) and VFA  
115 after feeding indicated a fast physiological response of the rumen microbiome to feed intake, with  
116 enhanced fermentation rates leading to increased methanogenesis rates. Furthermore, a transient  
117 increase of RNA in the rumen fluid was observed, which we consider a proxy for active microbiome  
118 biomass.  $34.1 \pm 6.5$ ,  $69.2 \pm 10.3$ ,  $70.0 \pm 13.9$  and  $37.0 \pm 6.3 \mu\text{g RNA}$  were extracted per gram rumen  
119 fluid at t0, t1, t3 and t5, respectively (Fig. 1d). Rumen fluids for VFA quantification and RNA  
120 extraction were sampled prior to gas measurements, as it was not possible to sample during

121 respiration chamber measurements. The similar patterns in gases, VFA and RNA profiles reflected a  
122 similar behaviour of the cows during the animal feeding trial (Supplementary Table S2).  
123 Taken together, GHG emissions, VFA production and RNA content indicated a consistent and fast  
124 growth response of the rumen microbiome and strong temporal dynamics on process level (Fig. 1b-d,  
125 Supplementary Figure S2) within each individual cow.

126 **Microbiome structure and dynamics.** We generated metatranscriptomes from the rumen fluid RNA  
127 using deep Illumina HiSeq paired-end sequencing and analysed the rRNA and mRNA content (Fig. 1,  
128 Supplementary Table S3). By taxonomic classification of the small subunit (SSU) rRNA transcripts we  
129 investigated if the rumen process dynamics (i.e. gas emissions and VFA production) were reflected in  
130 the taxonomic composition of the microbiome. This primer- and PCR-independent approach enables  
131 the holistic detection and classification of Eukarya, Bacteria and Archaea, typically not possible via  
132 PCR/amplicon-based techniques [28, 29]. The obtained three-domain profiles revealed that all major  
133 taxonomic groups known from ruminants were present (Fig. 2a-c, Supplementary Table S4), with  
134 eukaryotic, bacterial and archaeal taxa accounting for  $25.1 \pm 10.5 \%$ ,  $74.5 \pm 10.5 \%$  and  $0.3 \pm 0.1 \%$  of  
135 the SSU rRNA transcripts, respectively. Among the eukaryotes, Ciliates were dominant, accounting  
136 for  $> 70 \%$  of SSU rRNAs in 10 out of 16 metatranscriptomes. The presence of *Entodinium* spp.,  
137 *Epidinium* spp. and *Eudiplodinium maggii* and the absence of *Polyplastron multivesiculatum* was  
138 indicative of a type B ciliate community as typically found in cattle [30]. Altogether, 155 different  
139 bacterial families were detected. Out of these, 32 families were detected in all metatranscriptomes,  
140 with the ten most abundant being *Prevotellaceae*, *Succinivibrionaceae*, *Lachnospiraceae*,  
141 *Ruminococcaceae*, *Fibrobacteraceae*, *Spirochaetaceae*, *Erysipelotrichaceae*, *Veillonellaceae*  
142 (*Negativicutes*), RF16 and *Rikenellaceae*, accounting on average for 93.6 % of all bacterial SSU rRNA  
143 reads assigned to family level (Fig. 2c), potentially representing the bovine core microbiome [13]. All  
144 archaeal transcripts belonged to methanogens, with *Methanomassiliicoccales* and  
145 *Methanobacteriales* being the dominant orders.

146 Although the same major eukaryotic, bacterial and archaeal taxa were present the rumen fluid  
147 microbiomes were highly individual in each cow (Fig. 2d, Supplementary Table S4). For example, the  
148 proportion of eukaryotes in the individual rumen fluids varied from 11.6 – 40.9 % of total SSU rRNA  
149 transcripts. The two most prominent bacterial families, the *Prevotellaceae* and the  
150 *Succinivibrionaceae*, ranged from 21.0 – 66.0 % and 1.6 – 34.4 % of the microbial community  
151 composition, respectively. In contrast, their taxonomic composition was remarkably stable over the  
152 time course of the experiment (Fig. 2d) and did not show any consistent shifts in the individual cows,  
153 as revealed by several methods. Differential gene expression analysis showed no prokaryotic and no  
154 eukaryotic SSU rRNAs as differentially expressed at any time, except for three eukaryotic SSU rRNAs  
155 (i.e. *Epidinium*, *Eudiplodinium* and unassigned *Litostomata*). The latter were significantly less  
156 abundant at t5 compared to t3. Indicator species analysis identified several bacterial and eukaryotic  
157 taxa as significantly more abundant at certain time points (Supplementary Figure S3). However,  
158 except for the *Trichomonadidae* (*Parabasalia*), a group of flagellated *Protozoa*, which were found to  
159 be significantly more abundant at t5, only low abundance eukaryotic taxa were found to be  
160 indicators of the later time points. Furthermore, cow identity explained 64% of the variation in  
161 community composition (PERMANOVA  $p = 0.001$ ), while time did not explain a significant amount of  
162 variation (PERMANOVA  $p = 0.06$ ). Therefore, the strong temporal dynamics in rumen processes could  
163 not be explained by a successional shift in the community composition but rather by the strong  
164 increase in biomass (as reflected by the RNA content, Fig. 1d).

165 Analysis of mRNA gene expression profiles corroborated the notion that the observed process  
166 dynamics were an effect of overall increase in activities rather than due to an induction of specific  
167 microbial taxa or metabolisms. In two time course transitions (t3 vs. t1, t5 vs. t3), no significant  
168 differences were detected at all, while one hour after feeding less than 3 % of functional genes were  
169 significantly higher expressed (t1 vs. t0). The majority (65 %) fell into the subsystem protein  
170 biosynthesis (Fig. 3, Supplementary Table S5), namely transcripts of twelve SSU and 15 large subunit  
171 ribosomal proteins and the translation elongation factor G. Additionally, relative abundance of two

172 RNA polymerase subunit transcripts increased from t0 to t1. Only very few other transcripts, involved  
173 in respiration, LPS (Kdo<sub>2</sub>-Lipid A biosynthesis) and alanine biosynthesis, biosynthesis of branched-  
174 chain amino acids, stress response, DNA repair and VFA production/consumption were significantly  
175 more abundant at t1 compared to t0 (Fig. 3, Supplementary Table S5). Our results suggest an  
176 immediate upregulation of the protein biosynthesis machinery as the major global response of the  
177 microbiome to feed intake.

178 **Quantitative metatranscriptomics.** We analysed gene expression patterns of methanogens for  
179 successional changes during the experiment, which could explain the strong increase of CH<sub>4</sub>  
180 emissions. However, the relative abundance of the methanogenesis-specific mRNAs and SSU rRNA  
181 transcripts of methanogen decreased at the time points with highest CH<sub>4</sub> production (Fig. 4a). This  
182 pointed to a well-known problem in (meta-)omics approaches [31] i.e. linking relative abundances of  
183 taxa or genes/transcripts with biogeochemical processes that are derived from heterogeneous data.  
184 We thus calculated transcript abundances per volume of rumen fluid (equation 1) by integrating  
185 relative transcript abundance with total RNA concentrations extracted from rumen fluid. Using this  
186 quantitative metatranscriptomics approach, the transcript patterns of methanogens mirrored the  
187 observed dynamics in ruminant CH<sub>4</sub> emissions, with an increase of transcripts per g rumen fluid one  
188 to three hours (t1 and t3) and a decrease five hours after the feeding started (Fig. 4b). Similar effects  
189 were observed with gene expression patterns of other, broad cellular functions, e.g. DNA replication  
190 (Supplementary Figure S4).

#### 191 **Major players in plant biomass degradation and CH<sub>4</sub> production.**

192 Using this quantitative approach, we conducted a broad, integrative functional screening to identify  
193 the major microbial players in three key steps of anaerobic plant biomass degradation: (1)  
194 breakdown of complex plant polysaccharides, (2) carbohydrate fermentation to VFA and (3)  
195 methanogenesis. We used rumen fluid as proxy to analyse the complete anaerobic degradation  
196 cascade, although it has been shown that especially fibrolytic particle-associated communities can  
197 differ [32, 33].



198 **Degradation of plant polysaccharides.** A screening for transcripts of carbohydrate active enzymes  
199 (CAZymes) revealed that the four dominant CAZyme categories were cellulases, hemicellulases,  
200 starch degrading enzymes and oligosaccharide hydrolases, accounting for  $77.5 \pm 2.1$  %  
201 (Supplementary Figure S5 & Table S6). We quantified and taxonomically classified these transcripts  
202 to reveal their distribution among the rumen microbiome (Fig. 5). Three higher-level bacterial and  
203 two eukaryotic taxa were identified as predominantly involved, namely *Prevotellaceae*  
204 (*Bacteroidetes*), *Clostridiales* (*Firmicutes*), *Fibrobacter*, *Ciliophora* and *Fungi* (*Neocallimastigaceae*).  
205 While some of the links were known, e.g. *Fibrobacter* as major producer of cellulases [34], others are  
206 providing new insights into the complexity of CAZyme production by rumen microorganisms. For  
207 instance, Ciliates produced substantial amounts of hemicellulase and cellulase transcripts, and  
208 surprisingly few transcripts encoding starch-degrading enzymes, although they have long been  
209 considered as starch degraders [35]. Furthermore, the anaerobic fungi *Neocallimastigaceae*,  
210 produced the largest share of cellulase transcripts of all microorganisms. The abundant share of  
211 cellulase and hemicellulase transcripts encoded by *Clostridiales* establishes them as another key fibre  
212 degrading bacterial group in the rumen [36]. The data also show that *Prevotellaceae* primarily  
213 expressed genes encoding oligosaccharide hydrolases, starch degrading enzymes and hemicellulases,  
214 but not cellulases. *Firmicutes* appeared to have the broadest capacity for polysaccharide  
215 degradation, with equal abundances of CAZyme transcripts in all four investigated categories.  
216 However, the *Firmicutes* (*Clostridiales*) comprised several different genera within the  
217 *Ruminococcaceae* and *Lachnospiraceae*, whereas *Fibrobacteres* and *Bacteroidetes* were dominated  
218 by a single genus, *Fibrobacter* and *Prevotella*, respectively.  
219 The taxonomic distribution of CAZymes displayed strong differences between the cows, pointing to  
220 the same individuality as observed in the taxonomic composition of the rumen microbiome; e.g.  
221 Eukaryotes dominated the cellulase transcript pools in cow 1 and cow 4, whereas in cow 2 and cow 3  
222 *Fibrobacteres* and *Firmicutes* cellulase transcripts were equally abundant to *Ciliophora* and *Fungi*  
223 cellulase transcripts. Thus, the expression of the different CAZyme categories by three to four

224 different taxa shows a high functional redundancy for polysaccharide degradation in the rumen  
225 microbiome, within and between different domains of life.

226 **VFA production.** Acetate, propionate and butyrate were the major VFAs accounting for  $60.4 \pm 4.9$  %,   
227  $21.9 \pm 3.4$  % and  $11.6 \pm 2.7$  % of total VFAs, respectively. VFA concentrations in the rumen fluid  
228 increased after feed intake, while the pH dropped (Fig. 1c, Supplementary Table S7). Although no  
229 VFA production or absorption rates were measured, it has been shown that VFA concentrations are  
230 suitable proxies for production rates [4]. Quantitative metatranscriptomics revealed the presence of  
231 transcripts for three complete acetate production pathways from pyruvate, i.e. directly (via  
232 pyruvate:ubiquinone oxidoreductase, *poxB*), via acetyl-CoA and via acetyl-CoA and acetyl-P  
233 (Supplementary Figure S6). The transcripts were assigned to *Bacteroidetes* (mainly *Prevotella*) and  
234 *Firmicutes* (i.e. *Clostridiales* and *Negativicutes*), with transcript levels of *Prevotella* exceeding  
235 *Firmicutes* up to 30-times in the acetyl-CoA and acetyl-P pathway (Supplementary Figure S7A and B).  
236 In general, *poxB* transcript abundances (direct conversion of pyruvate to acetate) were one to two  
237 orders of magnitude lower than abundances of the other pathways (Supplementary Figure S7C), with  
238 *Clostridiales poxB* transcripts dominating over those of *Prevotella poxB* in all samples (1.4 – 64 times).  
239 Together, these results suggest that *Prevotella* were the dominant acetate producers in this  
240 experiment.

241 Transcript analysis revealed the presence of two distinct pathways for propionate production  
242 (Supplementary Figure S8), (1) from succinate (succinate pathway) and (2) from lactate (acrylate  
243 pathway). Transcript levels of *Prevotella* again exceeded *Firmicutes* (i.e. *Clostridiales*; up to 20-times),  
244 suggesting that *Prevotella* also dominated propionate production (Supplementary Figure S9A).

245 Transcripts for two complete pathways possibly leading to butyrate production were detected within  
246 the *Firmicutes*, i.e. the butyrate kinase pathway within *Clostridiales* and the butyryl-CoA:acetate CoA-  
247 transferase pathway within *Negativicutes* (Supplementary Figure S8 and S9B). These pathways only  
248 differ in the last step, i.e. the conversion of butyryl-CoA to butyrate, which is performed in two steps  
249 via butyryl-P by *Clostridiales* and directly by *Negativicutes*. In general, transcript abundances of VFA

250 production pathway enzymes mirrored the VFA concentration patterns, especially for acetate but to  
251 a lesser extent also for propionate and butyrate (Supplementary Figure S6 & S8), with a peak in  
252 transcript abundance at t1 or t3 and a subsequent decrease of transcripts at t5. Again, the transcript  
253 abundances and their taxonomic distribution showed marked differences between the individual  
254 cows. For instance, the abundance of transcripts for acetate production via acetyl-CoA and  
255 propionate production assigned to *Bacteroidetes* (mainly *Prevotella*) was much higher in cow 1  
256 compared to the other cows, reflecting the higher relative abundance of *Prevotella* within cow 1.  
257 Furthermore, *Negativicutes* (formerly *Veillonellaceae*) had a higher transcriptional activity for acetate  
258 production via acetyl-CoA and butyrate production than *Clostridiales* within cow 2 (Supplementary  
259 Figure S6 & S8) but not within the other cows.

260 **Methanogenesis.** *Methanomassiliococcales* and *Methanobacteriales* were the two dominant  
261 methanogenic orders, accounting for > 99 % of SSU rRNAs. All SSU rRNA transcripts assigned to the  
262 *Methanomassiliococcales* belonged to the GIT clade [37] a sister lineage of  
263 *Methanomassiliococcaceae*. Within the *Methanobacteriales*, the majority of the SSU rRNA transcripts  
264 belonged to the genus *Methanobrevibacter*, whereas *Methanosphaera* accounted for up to 13.3 %  
265 (mean 6.0 %). Between 2.7% and 24.4 % of *Methanobacteriales* SSU rRNA transcripts could not be  
266 assigned on a genus level (mean 15.2 %).

267 The abundance of SSU rRNA transcripts of both groups followed the CH<sub>4</sub> emission dynamics (Fig. 6a).  
268 However, only *Methanomassiliococcales* showed a strong positive linear correlation ( $r_s = 0.75$ ,  $p <$   
269  $0.001$ ) and only their SSU rRNAs showed significant differences over time similar to the CH<sub>4</sub> emissions  
270 (Fig. 6a). Methyl coenzyme M reductase (Mcr), the enzyme catalysing the last step in  
271 methanogenesis is conserved in all methanogenic Archaea. The gene encoding the  $\alpha$ -subunit of Mcr,  
272 *mcrA*, has thus been established as functional and phylogenetic marker for methanogens [38, 39]. No  
273 significant differences in *mcrA* transcript abundance were detected (Fig. 6b).

274 The specific methanogenesis pathways differ fundamentally between *Methanomassiliococcales* and  
275 *Methanobacteriales* (*Methanobrevibacter* and *Methanosphaera*). *Methanomassiliococcales* are H<sub>2</sub>

276 dependent methylotrophic methanogens reducing methylamines and methanol to CH<sub>4</sub> with H<sub>2</sub> as  
277 electron donor [40, 41] In contrast, *Methanobrevibacter* produces CH<sub>4</sub> mainly via the reduction of  
278 CO<sub>2</sub> with H<sub>2</sub> as electron donor. *Methanosphaera* in turn produces CH<sub>4</sub> from methanol and H<sub>2</sub> [42]. To  
279 identify temporal changes in the type of methanogenesis pathways actively used, we searched for  
280 transcripts of key-enzymes in these taxon-specific methanogenesis pathways: (1) Methylamine-  
281 specific methyltransferases (*mtMA*), involved in methanogenesis from methylamines by  
282 *Methanomassiliicoccales*, (2) Methyl-H<sub>4</sub>MPT:HS-CoM methyltransferase (*mtrA*), involved in  
283 methanogenesis from H<sub>2</sub> and CO<sub>2</sub> by *Methanobrevibacter* and (3) Methanol-specific  
284 methyltransferase transcripts (*mtaB*) involved in methanogenesis from methanol by  
285 *Methanosphaera* and *Methanomassiliicoccales*. We observed the same pattern for  
286 *Methanomassiliicoccales mtMA* transcripts as for the SSU rRNA transcripts, i.e. a strong positive  
287 response to the feed intake (Fig. 6c). In contrast, no response of *Methanobrevibacter mtrA* transcript  
288 levels was observed. Immediately after feed intake, the abundance of *mtaB* transcripts of  
289 *Methanosphaera* increased, correlating positively with CH<sub>4</sub> emissions ( $r_s = 0.59$ ,  $p < 0.05$ ) (Fig. 6d),  
290 while *Methanomassiliicoccales mtaB* transcripts negatively correlated with CH<sub>4</sub> emissions ( $r_s = -0.63$ ,  
291  $p < 0.01$ ). Taken together, these results indicate that only the methyl-reducing methanogens  
292 *Methanosphaera* and *Methanomassiliicoccales* responded to feed intake.

293

## 294 Discussion

295 In this study, we used an integrated approach, combining metatranscriptomics with targeted  
296 metabolomics (gas and VFA profiling) to holistically investigate the temporal rumen microbiome  
297 dynamics during plant biomass degradation in lactating cows.

298 By integrating relative transcript abundances with RNA concentrations, we were able to establish the  
299 link between rumen microorganism and their activity to processes such as gas emissions and VFA  
300 production. Due to the fast growth response of the microbiome to ruminant feed intake relative  
301 transcript abundances, which are commonly used in (meta-)transcriptomics, were not sufficient to

302 establish this link. Few studies have already applied quantitative metatranscriptomics in marine  
303 ecosystems (e.g. [43, 44]), focussing on Bacteria and nutrient cycling. Our study is the first host-  
304 associated study aiming to link process data to microbial taxa and functions. Furthermore, our  
305 approach is different as we apply total RNA concentrations instead of internal mRNA standards for  
306 sizing up metatranscriptomics. This quantitative approach allowed us to assess the temporal  
307 dynamics of major bacterial, eukaryotic and archaeal taxa involved in the three key steps of  
308 anaerobic plant biomass degradation in the cow rumen.

309 Our results showed that the microbiome composition was surprisingly stable during feed digestion.  
310 The strong increase of ruminant CH<sub>4</sub> emissions after feeding was not related to a microbial  
311 community shift as we had hypothesized but to a fast growth response of the whole rumen  
312 microbiome. This led to enhanced fermentation rates, reflected by the increase of CO<sub>2</sub>, H<sub>2</sub> and VFA  
313 concentrations and an associated rise in methanogenesis rates. A similar dynamic of bacterial  
314 concentrations (SSU rRNA gene copies per mL rumen fluid) as a response to ruminant feed intake  
315 was reported recently [25].

316 While the rumen microbiomes were stable over time, the individual microbiomes differed  
317 substantially between the four cows. Despite strong variation in abundance of bacterial and  
318 eukaryotic community members, these microbiomes exhibited similar fermentation characteristics,  
319 evidenced by gas output and VFA patterns. This points towards extensive functional redundancy  
320 among rumen microbiome members, where multiple microorganisms possess the same functional  
321 trait(s) and can replace each other [45, 13]. In fact, we could show high functional redundancy at all  
322 three key-steps of anaerobic carbohydrate degradation to CO<sub>2</sub> and CH<sub>4</sub>.

323

324 Remarkably, inter-domain functional redundancy was widespread among the fibrolytic community,  
325 where eukaryotes and bacteria contributed varying amounts of CAZyme transcripts within individual  
326 cows. For instance, most cellulase transcripts stemmed from two bacterial (*Fibrobacter* and  
327 *Clostridiales*) and two eukaryotic groups (*Neocallimastigaceae* and *Ciliophora*), with the eukaryotes

328 producing the largest share of cellulase transcripts in two out of the four cows. Inter-domain  
329 functional redundancy was also observed within hemicellulose, starch and oligosaccharide  
330 degradation, with marked differences between individual cows. Our results add to the growing  
331 notion that eukaryotic contribution to fibre degradation has been underestimated in the past. Very  
332 recent metatranscriptomic work with one individual sample also suggested ciliates and fungi as  
333 important for (hemi-)cellulose degradation [21].

334 Host individuality and functional redundancy were also revealed in the second key step of anaerobic  
335 plant biomass degradation, i.e. the fermentation of carbohydrates to VFA. Three major, well known  
336 VFA producing taxa [46, 47] were identified and their contribution to transcript pools of enzymes  
337 involved in VFA production was cow dependent. These taxa, i.e. *Bacteroidetes* (*Prevotella*),  
338 *Clostridiales* and *Negativicutes* (*Veillonellaceae*) produced acetate, propionate and butyrate via  
339 different fermentative pathways, of which some were shared among taxa and others were taxon-  
340 specific. Although *Prevotella* and *Clostridiales* in general dominated acetate/propionate and butyrate  
341 production, respectively, *Negativicutes* contributed substantially to acetate production via acetyl-  
342 CoA and butyrate production via the butyryl-CoA:acetate CoA-transferase pathway in cow 2.

343

344 The third and terminal step in anaerobic feed degradation is catalysed by methanogens. Also among  
345 these we observed functional redundancy. All detected groups (i.e. *Methanomassiliicoccales*,  
346 *Methanobrevibacter* and *Methanosphaera*) are characterised as hydrogenotrophic using H<sub>2</sub> as  
347 electron donor [40, 41, 42]. The removal of H<sub>2</sub> is important for the rumen ecosystem and the host  
348 because low concentrations of H<sub>2</sub> ensure high fermentation rates and efficient feed digestion [48].

349 The longitudinal experimental setup revealed temporal dynamics in electron acceptor usage within  
350 the *Methanomassiliicoccales*, where the fraction of methanol-specific methyltransferase transcripts  
351 was much lower immediately after feeding, exhibiting an opposite expression pattern to the  
352 methylamine-specific methyltransferases. In turn, it appeared that *Methanosphaera* dominated  
353 methanol reduction at these time points, showing once more the redundancy among organisms of

354 the same functional guild. The root cause for this might be manifold, e.g. due to a higher substrate  
355 affinity of *Methanomassiliicoccales* for methylamines as compared to methanol or higher  
356 concentrations of methylamines. Alternatively, *Methanosphaera* could outcompete  
357 *Methanomassiliicoccales* for methanol under conditions of high H<sub>2</sub> partial pressure. Taken together,  
358 the data suggest that the methyl-reducing *Methanomassiliicoccales* and *Methanosphaera* were  
359 responsible for the increase of CH<sub>4</sub> emissions immediately after feed intake and not the CO<sub>2</sub>-reducing  
360 *Methanobrevibacter*. This is surprising, given that CO<sub>2</sub> is a much more abundant methanogenesis  
361 substrate than methylamines and methanol. The sources of methylamines, i.e. glycine betaine (from  
362 beet) and choline (from plant membranes), and methanol (from the hydrolysis of methanolic side-  
363 groups in plant polysaccharides) are well known [49], however the amount of these substrates might  
364 vary substantially with different diets. Previous, less temporally resolved work suggested that  
365 *Methanobrevibacter* was associated with high CH<sub>4</sub> emissions [14, 49]. However, a comparison of  
366 sheep rumen metagenomes and metatranscriptomes indicated that *Methanomassiliicoccales* are  
367 very active community members in both high and low CH<sub>4</sub> “emitters”, with around 5 times higher  
368 abundances in the metatranscriptomes compared to the metagenomes [16]. Furthermore, their  
369 transcript abundances were significantly higher in high CH<sub>4</sub> “emitters”. Also in cows, it was shown  
370 that *Methanomassiliicoccales* can represent the predominant active methanogens [24]. In fact, a  
371 need for more research on methyl-reducing methanogens in the rumen was pointed out recently  
372 [49], including quantifying their contribution to rumen methane production. Further studies on  
373 *Methanomassiliicoccales* and *Methanosphaera* physiology *in vitro* and metabolic interactions with  
374 the substrate-providing microorganisms *in situ* might identify novel targets for CH<sub>4</sub> mitigation  
375 strategies, such as enzymes of the methyl-reducing pathway or the supply of methylated substrates.  
376 Such efforts might complement general methanogenesis inhibitors such as 3-nitrooxypropanol to  
377 achieve more efficient methane mitigation [50].

378

## 379 **Conclusions**

380 To our knowledge, our study is the first longitudinal integrated meta-omics analysis of the rumen  
381 microbiome during plant biomass degradation. It is another step towards a comprehensive system-  
382 level understanding of the dynamic rumen ecosystem, as envisioned by Hungate and coworkers  
383 already more than 50 years ago [11]. Applying a quantitative metatranscriptomics approach, it  
384 enabled the time-resolved link between microbiome structure and function and rumen processes. It  
385 revealed a rather simple response to feed intake, namely a general growth of the whole community,  
386 without the detection of distinct successional stages during degradation. The cow-individual  
387 microbiomes exhibited a surprisingly high functional redundancy at several steps of anaerobic  
388 degradation pathway, which can be seen as example for the importance of multi-functional diversity  
389 for robustness of ecosystems, similar to what has been found in terrestrial biomes [51]. It  
390 furthermore points towards CH<sub>4</sub> mitigation strategies that directly tackle the producers of CH<sub>4</sub>, since  
391 all other functional guilds show high organismic diversity with individual taxa being replaceable by  
392 others.

393

## 394 **Methods**

395 **Animal feeding trial** (Fig. 1a). The animal feeding trial was conducted at the Department of Animal  
396 Science, Aarhus University (Denmark). The animal experiments were approved by The Experimental  
397 Animal Inspectorate under The Danish Ministry of Justice (journal no. 2008/561-1500). Four rumen-  
398 cannulated lactating Holstein dairy cows were fed a typical dairy cow diet containing mainly clover  
399 grass and corn silage (Supplementary Table S1 and S2) twice a day in a semi-restrictive way. The cows  
400 were in the second parity or later, they were  $215 \pm 112$  (mean  $\pm$  standard deviation) days in milk, had  
401 live weight at  $602 \pm 20$  kg and had a milk yield at  $33.5 \pm 5.4$  kg (Supplementary Table S8). Prior to the  
402 sampling, which was conducted over four days, the animals had been fed the respective diet  
403 continuously for more than two weeks. Day 1: Cows were fed ad libitum. Day 2: The feed was  
404 removed at 4 am, cows were allowed to eat from 7 am to 8 am, and again from 2 pm until 4 am the  
405 next day. Rumen fluid was sampled at time points 4 am, 7 am, 8 am and every second hour until 10



406 pm, and with a final sampling at 4 am on day 3. Rumen fluid was randomly sampled from different  
407 areas of the rumen, pooled and filtered through sterile filter bags with a pore size of 0.5 mm (Grade  
408 Blender Bags, VWR, Denmark). The pH of the rumen liquid samples was directly analysed with a  
409 digital pH meter (Meterlab PHM 220, Radiometer, Denmark) and subsamples were frozen at -20°C  
410 for VFA analysis and other chemical analysis, or flash-frozen in liquid nitrogen and stored at -80°C for  
411 nucleic acid extraction. Day 3: Animals were transferred to custom-built transparent polycarbonate  
412 open-circuit respiration chambers (1.45 x 3.90 x 2.45 m) and fed ad libitum. Day 4: The cows were  
413 fed like on day 2. CH<sub>4</sub>, CO<sub>2</sub> and H<sub>2</sub> were quantified continuously throughout the day.

414 **CH<sub>4</sub>, CO<sub>2</sub>, H<sub>2</sub> and VFA quantification.** The open-circuit indirect calorimetry based respiration  
415 chambers, kept at slight under pressure, measured gas exchange (CH<sub>4</sub>, CO<sub>2</sub>, O<sub>2</sub>, and H<sub>2</sub>; Columbus  
416 Instruments, Columbus, USA), air flow and feed intake continuously during the experiment as  
417 described in detail in [52] and in [53]. VFAs in the rumen liquid samples were quantified using a  
418 Hewlett Packard gas chromatograph (model 6890, Agilent Technologies Inc., Wilmington, DE, USA)  
419 with a flame ionization detector and a 30-m SGE BP1 column (Scientific Instrument Services, NJ, USA)  
420 as described in [54].

421 **Nucleic acid extraction and linear RNA amplification** (Fig. 1a). Nucleic acids were extracted based on  
422 the method of [55], and as described in [28]. Extraction buffer and phenol:chloroform (5:1, pH 4.5,  
423 ambion), 0.5 mL of each, were added to a lysing matrix E tube (MP Biomedicals) containing  
424 approximately 0.25 g of rumen fluid sample. Cells were mechanically lysed using a FastPrep machine  
425 (MP Biomedicals, speed 5.5, 30 sec) followed by nucleic acid precipitation with PEG 8000. All steps  
426 were performed on ice or at 4°C. Nucleic acids were re-suspended in 50 µL DEPC H<sub>2</sub>O and 1 µL of  
427 RNaseOUT™ (Thermo Fisher Scientific) was added. 10 µL of nucleic acid extracts were subject to  
428 DNase treatment (RQ1 DNase, Promega) and subsequent RNA purification (MEGAclean™ Kit,  
429 Ambion). Quantity and quality of RNA was assessed via agarose gel electrophoresis, NanoDrop® (ND  
430 1000, peqlab) and Qubit™ (Thermo Fisher Scientific). Absence of DNA in the RNA preparations was  
431 verified by PCR assays targeting bacterial SSU rRNA genes and archaeal *mcrA* genes. MessageAmp™

432 II-Bacterial Kit (ambion) was used according to the manufacturer's manual to synthesise cDNA (via  
433 polyadenylation of template RNA and reverse transcription) and perform *in vitro* transcription on the  
434 cDNA to amplify total RNA.

435 **Sequencing and sequence data pre-processing.** Illumina HiSeq 2500 paired-end (125 bp) sequencing  
436 was performed at the Next Generation Sequencing Facility of the Vienna Biocenter Core Facilities on  
437 cDNA. The template fragment size was adjusted that paired sequence reads could be overlapped. We  
438 used PRINSEQ lite v. 0.20.4 [56] to apply quality filters and trim the reads (parameters -min\_len 180 -  
439 min\_qual\_mean 25 -ns\_max\_n 5 -trim\_tail\_right 15 -trim\_tail\_left 15). SortMeRNA v. 2.0 [57] was  
440 used to separate sequence reads into SSU rRNA, LSU rRNA and putative mRNA reads. For more  
441 details and results of the initial data processing steps see supplementary Table S3. All computations  
442 were performed using the CUBE computational resources, University of Vienna (Austria), or run on  
443 the HPC resource STALLO at the University of Tromsø (Norway). Raw sequence data have been  
444 submitted to the NCBI Sequence Read Archive (SRA) under the accession numbers SAMN07313968 -  
445 SAMN07313983.

446 **Taxonomic classification of SSU rRNA reads.** We generated random SSU rRNA subsamples  
447 containing 50,000 reads out of all SSU rRNA reads with a length between 200 to 220 bp ( $45.8 \pm 11.5$   
448 % of total SSU rRNA reads). These subsamples were taxonomically classified with BLASTN against the  
449 SilvaMod rRNA reference database of CREST [58] and analysed with MEGAN [59] v. 5.11.3  
450 (parameters: minimum score 100, minimum support 1, top 2 %, 50 best blast hits). Three domain  
451 profiles were visualised with treemaps based on CREST taxonomy. Statistical analyses were done  
452 with R [60]; packages: edgeR [61], vegan [62], indicpecies [63], heat map3 [64].

453 **Analysis of mRNA.** All putative mRNA reads were compared against the GenBank nr database using  
454 DIAMOND ([65]; v0.7.11, database as of December 2015, CUBE).

455 **CAZzymes.** Randomly selected subsamples of 2 million nucleotide reads per dataset were translated  
456 into open reading frames (ORFs) of 30 amino acids or longer. The ORFs were screened for protein  
457 families using HMMER and reference Hidden Markov Models (HMMER v3.0, against the Pfam

458 database v27; [66]). All database hits with e-values below a threshold of  $10^{-4}$  were counted. Pfam  
459 annotations were screened for CAZymes using Pfam models of previously identified CAZymes [67]  
460 and additional rumen relevant CAZymes [22] as well as CAZymes added to the Pfam-A database after  
461 these publications and summarized into higher categories (Supplementary Table S6). Translated  
462 reads assigned to any Pfam model of one of the four most dominant categories i.e. cellulases,  
463 hemicellulases, starch degrading enzymes and oligosaccharide hydrolases (Supplementary Figure S5)  
464 were extracted and blastp was used to obtain taxonomic information (blastp against the monthly  
465 updated nr db 04.2016, CUBE). BLAST tables were imported in MEGAN (parameters: minimum score  
466 50, minimum support 1, top 5 %, 25 best blast hits) and further analysed. CAZymes were quantified  
467 as described below (equation 1).

468 **VFA.** All mRNA reads assigned to any major taxa involved in the production of VFA, as identified by  
469 the SEED analyzer implemented in MEGAN, were subject to further analysis to reconstruct major VFA  
470 production (turnover) pathways. These metatranscriptomic libraries were screened for all enzymes  
471 (via their respective EC numbers) involved in the production/turnover of acetate, propionate and  
472 butyrate, by blastp searches (evaluate threshold  $1e^{-10}$ ) using the metatranscriptomic libraries as queries  
473 against the UniRef50 database (monthly updated, 12.2016, CUBE). The respective enzyme names were  
474 derived from the KEGG reference pathways and literature [68, 69]. Heatmaps were constructed in R  
475 using quantified data ( $\mu\text{g transcripts g}^{-1}$  rumen fluid; equation 1) normalized by the sum of each  
476 transcripts over all time-points for each individual cow.

477 **Methanogenesis.** Specific transcripts for methanogenesis were extracted from the DIAMOND  
478 annotation files via MEGAN and the implemented SEED analyzer. Assignments were critically  
479 manually evaluated and in case of uncertainty blastn was used to verify accuracy and origin of the  
480 methanogenesis transcripts as well as of the SSU rRNA transcripts (against the NCBI and Silva  
481 databases as of September 2016). Transcripts were quantified (equation 1). Pearson's product-  
482 moment correlations and spearman rank correlation coefficients ( $\rho = r_s$ ) between methanogen  
483 specific transcripts (pathway specific key transcripts and SSU rRNA transcripts) were calculated and

484 paired t-test was used to assess temporal differences in transcript abundance (R functions:  
485 `shapiro.test`, `cor.test`, `t.test`).

486 **Differential gene expression analysis.** mRNA. DIAMOND annotations were imported in MEGAN  
487 (parameters: minimum score 40, minimum support 1, top 10 %) and relative abundances of mRNA  
488 reads assigned to a SEED function were subject to differential gene expression analysis using edgeR  
489 (function: `glmFit`). Low expressed genes were filtered out and the default TMM method was used to  
490 normalize the data. To account for the cow differences a design matrix was constructed prior to the  
491 analysis to account for our experimental design and correct for batch effects (cow differences). rRNA.  
492 Taxon tables, as described above were subject to differential gene expression analysis following the  
493 same workflow as described for the SEED functions.

494 **Quantification of mRNA and rRNA transcripts per gram rumen fluid.** We quantified mRNA and rRNA  
495 transcripts per gram rumen fluid as follows:

$$transcriptA = totalRNA \times \frac{xRNA_r}{xRNA_r + yRNA_r} \times \frac{transcript A_r}{xRNA_{subsample_r}} \times \frac{N_A}{M(Nt) \times transcript A_{length}} \quad (1)$$

497

498 where *totalRNA* is the amount of RNA [µg] extracted per gram rumen fluid, *xRNA<sub>r</sub>*, *yRNA<sub>r</sub>* and  
499 *xRNA<sub>subsample\_r</sub>* are the number of reads of m/rRNA, r/mRNA and m/rRNA subsample used for  
500 functional annotation or taxonomic classification, respectively. *transcriptA<sub>r</sub>* and *transcriptA<sub>length</sub>* are  
501 the number of reads assigned to a certain transcript and the length of the particular transcript. *N<sub>A</sub>* is  
502 the Avogadro constant and *M(Nt)* is the average molecular weight of a ssDNA nucleotide (330 × 10<sup>6</sup>  
503 µg mol<sup>-1</sup>). For the transcript lengths we used average values of 1000 and 1500/1900  
504 (prokaryotes/eukaryotes) nucleotides for mRNA and rRNA transcripts, respectively. As previously  
505 observed [70] the polyadenylation during cDNA synthesis is moderately enriching mRNA, therefore a  
506 ratio of mRNA:totalRNA reads of 1:25 was used to calculate transcript numbers per gram rumen  
507 fluid, as this ratio was observed in a previous study on the rumen microbiome of cows from the same

508 breed, housed at the same facility, fed a diet containing similar amounts of neutral detergent fibre,  
509 crude protein and fat [24].

510

## 511 **Declarations**

512 **Ethics approval and consent to participate.** The animal experiments were approved by The  
513 Experimental Animal Inspectorate under The Danish Ministry of Justice (journal no. 2008/561-1500).

514 **Consent for publication.** Not applicable.

515 **Availability of data and material.** Raw sequence data have been submitted to the NCBI Sequence  
516 Read Archive (SRA) under the accession numbers SAMN07313968 - SAMN07313983.

517 **Competing interests.** The authors declare that they have no competing interests.

518 **Funding.** A.S. was financially supported by a scholarship of the University of Vienna for doctoral  
519 candidates (uni:docs), a travel scholarship of the University of Vienna (KWA) and a scholarship by the  
520 OeAD (Austrian agency for international mobility and cooperation in education, science and  
521 research) for doctoral candidates (Marietta-Blau-Fellowship). T.U acknowledges financial support  
522 from the University of Greifswald.

523 **Authors' contributions.** The study was designed by M.P., A.S. and T.U. Samples were collected by  
524 M.P. Gas and VFA quantifications were established and performed by M.P. AL.H. and P.L. RNA  
525 extractions and sample preparation were performed by A.S. Analysis of Illumina sequencing data  
526 were performed by A.S., AT.T. and T.U. Statistical analyses and figures were done by A.S. and J.B,  
527 assisted by M.B. and AT.T. The manuscript was written by A.S. and T.U., assisted by all co-authors.

528 **Acknowledgements.** We thank Thomas Rattei (University of Vienna) for bioinformatics support and  
529 Andreas Sommer and the Vienna Biocenter Next Generation Sequencing Facility ([www.vbcf.ac.at](http://www.vbcf.ac.at)) for  
530 library preparation and sequencing.

531

## 532 **References**

533 1. Hungate RE. The rumen microbial ecosystem. *Annu Rev Ecol Evol Syst.* 1975;6:39-66.

- 534 2. IPCC Core Writing Team, Pachauri RK & Meyer LA, editors. Climate Change 2014: Synthesis  
535 Report. Contribution of Working Groups I, II and III to the Fifth Assessment Report of the  
536 Intergovernmental Panel on Climate Change. Geneva: IPCC; 2014.
- 537 3. Hofmann RR. Evolutionary steps of ecophysiological adaptation and diversification of ruminants:  
538 a comparative view of their digestive system. *Oecologia* 1989;78:443-457.
- 539 4. Bergman EN. Energy contributions of volatile fatty acids from the gastrointestinal tract in various  
540 species. *Physiol rev.* 1990;70:567-90.
- 541 5. Johnson KA, Johnson DE. Methane emissions from *cattle*. *J Anim Sci.* 1995;73:2483-92.
- 542 6. Stocker TF, Qin D, Plattner G-K, Tignor M, Allen SK, Boschung J, Nauels A, Xia Y, Bex V, Midgley  
543 PM, editors. Climate Change 2013: The Physical Science Basis. Contribution of Working Group I to  
544 the Fifth Assessment Report of the Intergovernmental Panel on Climate Change. Cambridge:  
545 Cambridge University Press; 2013.
- 546 7. Alexandratos N, Bruinsma J. World agriculture towards 2030/2050: the 2012 revision. Food and  
547 Agriculture Organization of the United Nations (FAO) 2012.
- 548 8. Kumar S, Choudhury PK, Carro MD, Griffith GW, Dagar SS, Puniya M et al. New aspects and  
549 strategies for methane mitigation from ruminants. *Appl Microbiol Biotechnol.* 2014;98:31-44.
- 550 9. Gruby D, Delafond HMO. Recherches sur des animalcules se développant en grand nombre dans  
551 l'estomac et dans les intestins, pendant la digestion des animaux herbivores et carnivores. *Compt*  
552 *rend acad sci.* 1843;17:1304-1308.
- 553 10. Hungate RE. Studies on cellulose fermentation: III. The culture and isolation for cellulose-  
554 decomposing bacteria from the rumen of cattle. *J bacteriol.* 1947;53:631.
- 555 11. Hungate RE. I. Microbial ecology of the rumen. *Bacteriol rev.* 1960;24:353-364.
- 556 12. Orpin CG. Studies on the rumen flagellate *Neocallimastix frontalis*. *J Gen Microbiol.* 1975;91:249-  
557 62.

- 558 13. Henderson G, Cox F, Ganesh S, Jonker A, Young W, Global Rumen Census Collaborators *et al.*  
559 Rumen microbial community composition varies with diet and host, but a core microbiome is  
560 found across a wide geographical range. *Sci Rep.* 2015;5:14567.
- 561 14. Wallace RJ, Snelling TJ, McCartney CA, Tapio I, Strozzi F. Application of meta-omics techniques to  
562 understand greenhouse gas emissions originating from ruminal metabolism. *Genet Sel Evol.*  
563 2017;49:9.
- 564 15. Kittelmann S, Pinares-Patiño CS, Seedorf H, Kirk MR, Ganesh S, McEwan JC *et al.* Two different  
565 bacterial community types are linked with the low-methane emission trait in sheep. *PLoS ONE*  
566 2014;9:e103171.
- 567 16. Shi W, Moon CD, Leahy SC, Kang D, Froula J, Kittelmann S *et al.* Methane yield phenotypes linked  
568 to differential gene expression in the sheep rumen microbiome. *Genome Res.* 2014;24:1517-  
569 1525.
- 570 17. Jeyanathan J, Kirs M, Ronimus R, Hoskin S, Janssen P. Methanogen community structure in the  
571 rumens of farmed sheep, cattle and red deer fed different diets. *FEMS Microbiol Ecol.*  
572 2011;76:311-326.
- 573 18. Sun X, Henderson G, Cox F, Molano G, Harrison SJ, Luo D *et al.* Lambs fed fresh winter forage  
574 rape (*Brassica napus* L.) emit less methane than those fed perennial ryegrass (*Lolium perenne* L.),  
575 and possible mechanisms behind the difference. *PLoS ONE* 2015;10:e0119697.
- 576 19. Hristov AN, Oh J, Firkins JL, Dijkstra J, Kebreab E, Waghorn G *et al.* Special topics - Mitigation of  
577 methane and nitrous oxide emissions from animal operations: I. A review of enteric methane  
578 mitigation options. *J Anim Sci.* 2013;91:5045-5069.
- 579 20. Dai X, Tian Y, Li J, Luo Y, Liu D, Zheng H *et al.* Metatranscriptomic analyses of plant cell wall  
580 polysaccharide degradation by microorganisms in the cow rumen. *Appl Environ Microbiol.*  
581 2015;81:1375-1386.

- 582 21. Comtet-Marre S, Parisot N, Lepercq P, Chaucheyras-Durand F, Mosoni P, Peyretilade E *et al.*  
583 Metatranscriptomics reveals the active bacterial and eukaryotic fibrolytic communities in the  
584 rumen of dairy cow fed a mixed diet. *Front Microbiol.* 2017;8:67.
- 585 22. Hess M, Sczyrba A, Egan R, Kim TW, Chokhawala H, Schroth G *et al.* Metagenomic discovery of  
586 biomass-degrading genes and genomes from cow rumen. *Science* 2011;331:463-467.
- 587 23. Patra AK. Enteric methane mitigation technologies for ruminant livestock: a synthesis of current  
588 research and future directions. *Environ Monit Assess.* 2012;184:1929-52.
- 589 24. Poulsen M, Schwab C, Jensen BB, Engberg RM, Spang A, Canibe N *et al.* Methylophilic  
590 methanogenic Thermoplasmata implicated in reduced methane emissions from bovine rumen.  
591 *Nat Commun.* 2013;4:1428.
- 592 25. Van Lingen HJ, Edwards JE, Vaidya JD, van Gastelen S, Saccenti E, van den Bogert B *et al.* Diurnal  
593 dynamics of gaseous and dissolved metabolites and microbiota composition in the bovine  
594 rumen. *Front Microbiol.* 2017;8:425.
- 595 26. Patra AK, Park T, Kim M, Yu Z. Rumen methanogens and mitigation of methane emission by anti-  
596 methanogenic compounds and substances. *J Anim Sci Biotechnol.* 2017;8:13.
- 597 27. Li F, Henderson G, Sun X, Cox F, Janssen PH, Guan le L. Taxonomic assessment of rumen  
598 microbiota using total RNA and targeted amplicon sequencing approaches. *Front Microbiol.*  
599 2016;7:987.
- 600 28. Urich T, Lanzén A, Qi J, Huson DH, Schleper C, Schuster SC. Simultaneous assessment of soil  
601 microbial community structure and function through analysis of the meta-transcriptome. *PLoS*  
602 *ONE* 2008;3:e2527.
- 603 29. Geisen S, Tveit AT, Clark IM, Richter A, Svenning MM, Bonkowski M *et al.* Metatranscriptomic  
604 census of active protists in soils. *ISME J.* 2015;9:2178-2190.
- 605 30. Eadie JM. Inter-relationships between certain rumen ciliate protozoa. *J gen Microbiol.*  
606 1962;29:579-588.
- 607 31. Schimel J. Microbial ecology: Linking omics to biogeochemistry. *Nat Microbiol.* 2016;27:15028.



- 608 32. Kong Y, Teather R, Forster R. Composition, spatial distribution, and diversity of the bacterial  
609 communities in the rumen of cows fed different forages. *FEMS Microbiol Ecol.* 2010;74:612-22.
- 610 33. Michalet-Doreau B, Fernandez I, Peyron C, Millet L, Fonty G. Fibrolytic activities and cellulolytic  
611 bacterial community structure in the solid and liquid phases of rumen contents. *Reprod Nutr*  
612 *Dev.* 2001;41:187-94.
- 613 34. Flint HJ, Scott KP, Duncan SH, Louis P, Forano E. Microbial degradation of complex carbohydrates  
614 in the gut. *Gut Microbes* 2012;3:289-306.
- 615 35. Williams AG, Coleman GS. The rumen protozoa. In: Hobson PN, Stewart CS, editors. *The rumen*  
616 *microbial ecosystem.* Netherlands: Springer; 1997. p 73-139.
- 617 36. Ben David Y, Dassa B, Borovok I, Lamed R, Koropatkin NM, Martens EC *et al.* Ruminococcal  
618 cellulosome systems from rumen to human. *Environ Microbiol.* 2015;17:3407-3426.
- 619 37. Söllinger A, Schwab C, Weinmaier T, Loy A, Tveit AT, Schleper C *et al.* Phylogenetic and genomic  
620 analysis of Methanomassiliicoccales in wetlands and animal intestinal tracts reveals clade-specific  
621 habitat preferences. *FEMS Microbiol Ecol.* 2016;92:fiv149.
- 622 38. Paul K, Nonoh J, Mikulski L, Brune A. 'Methanoplasmatales,' Thermoplasmatales-Related Archaea  
623 in termite guts and other environments, are the seventh order of methanogens. *Appl Environ*  
624 *Microbiol.* 2012;78:8245-8253.
- 625 39. Lueders T, Chin KJ, Conrad R, Friedrich M. Molecular analyses of methyl-coenzyme M reductase  
626 alpha-subunit (*mcrA*) genes in rice field soil and enrichment cultures reveal the methanogenic  
627 phenotype of a novel archaeal lineage. *Environ Microbiol.* 2001;3:194-204.
- 628 40. Lang K, Schuldes J, Klingl A, Poehlein A, Daniel R, Brune A. New mode of energy metabolism in  
629 the seventh order of methanogens as revealed by comparative genome analysis of 'Candidatus  
630 *Methanoplasma termitum*'. *Appl Environ Microbiol.* 2015;81:1338-1352.
- 631 41. Borrel G, Parisot N, Harris HM, Peyretilade E, Gaci N, Tottey W *et al.* Comparative genomics  
632 highlights the unique biology of Methanomassiliicoccales, a Thermoplasmatales-related seventh  
633 order of methanogenic archaea that encodes pyrrolysine. *BMC Genomics* 2014;15:679.

- 634 42. Liu Y, Whitman W. Metabolic, phylogenetic, and ecological diversity of the methanogenic  
635 Archaea. *Ann N Y Acad Sci.* 2008;1125:171-189.
- 636 43. Gifford SM, Sharma S, Rinta-Kanto JM, Moran MA. Quantitative analysis of a deeply sequenced  
637 marine microbial metatranscriptome. *ISME J.* 2011;5:461-472.
- 638 44. Moran MA, Satinsky B, Gifford SM, Luo H, Rivers A. Sizing up metatranscriptomics. *ISME J.*  
639 2013;7:237-243.
- 640 45. Weimer PJ. Redundancy, resilience, and host specificity of the ruminal microbiota: implications  
641 for engineering improved ruminal fermentations. *Front Microbiol.* 2015;6:296.
- 642 46. Li X, Højberg O, Canibe N, Jensen BB. Phylogenetic diversity of cultivable butyrate-producing  
643 bacteria from pig gut content and feces. *J Anim Sci.* 2016;94:377-381.
- 644 47. Reichardt N, Duncan SH, Young P, Belenguer A, McWilliam Leitch C, Scott KP *et al.* Phylogenetic  
645 distribution of three pathways for propionate production within the human gut microbiota. *ISME*  
646 *J.* 2014;8:1323-35.
- 647 48. Janssen P, Kirs M. Structure of the Archaeal Community of the Rumen. *Appl Environ Microb.*  
648 2008;74:3619-3625.
- 649 49. Tapio I, Snelling TJ, Strozzi F, Wallace RJ. The ruminal microbiome associated with methane  
650 emissions from ruminant livestock. *J Anim Sci Biotechnol.* 2017;8:7.
- 651 50. Duin EC, Wagner T, Shima S, Prakash D, Cronin B, Yáñez-Ruiz DR *et al.* Mode of action uncovered  
652 for the specific reduction of methane emissions from ruminants by the small molecule 3-  
653 nitrooxypropanol. *Proc Natl Acad Sci U S A.* 2016;113:6172-6177.
- 654 51. Soliveres S, van der Plas F, Manning P, Prati D, Gossner MM, Renner SC *et al.* Biodiversity at  
655 multiple trophic levels is needed for ecosystem multifunctionality. *Nature*  
656 2016;25,536(7617):456-9.
- 657 52. Hellwing AL, Lund P, Weisbjerg MR, Brask M, Hvelplund T. Technical note: Test of a low cost and  
658 animal-friendly system for measuring methane emissions from dairy cows. *J Dairy Sci.*  
659 2012;95:6077-6085.

- 660 53. Petersen SO, Hellwing AL, Brask M, Højberg O, Poulsen M, Zhu Z *et al.* Dietary nitrate for  
661 methane mitigation leads to nitrous oxide emissions from dairy cows. *J Environ Qual.*  
662 2015;44:1063-1070.
- 663 54. Canibe N, Højberg O, Badsberg JH, Jensen BB. Effect of feeding fermented liquid feed and  
664 fermented grain on gastrointestinal ecology and growth performance in piglets. *J Anim Sci.*  
665 2007;85:2959-71.
- 666 55. Griffiths RI, Whiteley AS, O'Donnell AG, Bailey MJ. Rapid method for coextraction of DNA and  
667 RNA from natural environments for analysis of ribosomal DNA-and rRNA-based microbial  
668 community composition. *Appl Environ Microbiol.* 2000;66:5488-5491.
- 669 56. Schmieder R & Edwards R. Quality control and preprocessing of metagenomic datasets.  
670 *Bioinformatics* 2011;27:863-4.
- 671 57. Kopylova E, Noé L & Touzet H. SortMeRNA: fast and accurate filtering of ribosomal RNAs in  
672 metatranscriptomic data. *Bioinformatics* 2012;28:3211-3217.
- 673 58. Lanzén A, Jørgensen SL, Huson DH, Gorfer M, Grindhaug SH, Jonassen I *et al.* CREST—classification  
674 resources for environmental sequence tags. *PloS ONE* 2012;7:e49334.
- 675 59. Huson DH, Mitra S, Ruscheweyh H-J, Weber N, Schuster SC. Integrative analysis of environmental  
676 sequences using MEGAN4. *Genome Res.* 2011;21:1552-1560.
- 677 60. R Core Team. R: A language and environment for statistical computing. R Foundation for  
678 Statistical Computing. 2013; Vienna, Austria.
- 679 61. McCarthy DJ, Chen Y & Smyth GK. Differential expression analysis of multifactor RNA-Seq  
680 experiments with respect to biological variation. *Nucleic Acids Res.* 2012;40:4288-97.
- 681 62. Oksanen J *et al.* *vegan: Community Ecology Package.* R package version 2.3-4. 2016.  
682 <https://CRAN.R-project.org/package=vegan>.
- 683 63. De Cáceres M & Legendre P. Associations between species and groups of sites: indices and  
684 statistical inference. *Ecology* 2009;90:3566-74.

- 685 64. Zhao S, Guo Y, Sheng Q & Shyr Y. Heatmap3: an improved heatmap package with more powerful  
686 and convenient features. *BMC Bioinformatics* 2014;15:P16.
- 687 65. Buchfink B, Xie C, Huson D. Fast and sensitive protein alignment using DIAMOND. *Nat Methods*  
688 2015;12:59-60.
- 689 66. Finn R, Bateman A, Clements J, Coggill P, Eberhardt RY, Eddy SR *et al.* Pfam: the protein families  
690 database. *Nucleic Acids Res.* 2014;42:D222-D230.
- 691 67. Tveit A, Urich T, Frenzel P & Svenning M. Metabolic and trophic interactions modulate methane  
692 production by Arctic peat microbiota in response to warming. *Proc Natl Acad Sci USA.*  
693 2015;112:E2507-E2516.
- 694 68. Louis P & Flint HJ. Diversity, metabolism and microbial ecology of butyrate-producing bacteria  
695 from the human large intestine. *FEMS Microbiol Lett.* 2009;294:1-8.
- 696 69. Vital M, Howe AC & Tiedje JM. Revealing the bacterial butyrate synthesis pathways by analyzing  
697 (meta) genomic data. *MBio* 2014;5:e00889-14.
- 698 70. Frias-Lopez J *et al.* Microbial community gene expression in ocean surface waters. *Proc Natl Acad*  
699 *Sci USA.* 2008;105:3805-3810.

700

## 701 **Supplementary Information**

702 Supplementary Information is provided in the PDF document "Supplementary\_Figures\_Tables.pdf".

703 This Supplementary Information contains Figures and Tables supplementing the main manuscript.

## 704 **Figure legends**

705 **Figure 1. Ruminant gas emissions and volatile fatty acid (VFA) production.** (a) Overview of the  
706 animal feeding trial during twelve hours (4 am - 4 pm) of sampling; for more details see Methods  
707 section. (b) Carbon dioxide (CO<sub>2</sub>), methane (CH<sub>4</sub>) and hydrogen (H<sub>2</sub>) emissions measured using open-  
708 circuit respiration chambers. (c), (d) Total VFA concentrations and total RNA content quantified per  
709 gram rumen fluid (RF). Colour code indicates the four rumen-cannulated Holstein dairy cows.

710

711 **Figure 2. Rumen microbiome community composition and temporal dynamics.** Three domain  
712 profiles showing the overall rumen microbial community composition on phylum (a), class (b) and  
713 family (c) level. Tile sizes are reflecting the average relative abundance of eukaryotic (green),  
714 bacterial (blue) and archaeal (orange) taxa observed in the 16 rumen metatranscriptomes. (d) shows  
715 the highly individual microbial communities within each cow over time. Taxa which could not be  
716 assigned on family level and/or showed relative abundance  $\leq 0.01\%$  level are shown on higher  
717 taxonomic levels. All taxa detected in the rumen microbiomes and their relative abundances are  
718 listed in Supplementary Table S4.

719

720 **Figure 3. Global functional response of rumen microbiome to ruminant feed intake.** Boxes showing  
721 the mean relative abundance of SEED subsystem level 1 (a), SEED subsystem level 2 (b), SEED  
722 subsystem level 3 (c) and SEED functions (c, small tiles) of eight rumen metatranscriptomes (t0 and t1  
723 metatranscriptomes). Colour code indicates SEED subsystems containing functions that were  
724 identified by differential gene expression analysis to be significantly higher expressed one hour after  
725 the feeding (t1) compared to before the feeding (t0). The particular upregulated functions are  
726 coloured in orange. All functions that were subject to differential gene expression analysis (1659  
727 SEED functions) are depicted, low abundant transcripts were excluded. For more details on the  
728 significantly higher expressed functions (e.g. functional assignment of the numbered tiles) see  
729 Supplementary Table S5.

730 **Figure 4. Comparison of relative and quantified transcript abundance of methanogens.** Relative and  
731 quantified transcript abundance of methanogenesis specific mRNA (upper boxplots) and SSU rRNA of  
732 methanogens (lower boxplots) are depicted in (a) and (b), respectively. Data: mRNA reads assigned  
733 to the SEED subsystem Methanogenesis and SSU rRNA reads assigned to methanogens were  
734 summarized. For details on the quantification see Methods section and equation 1; x-axis: before  
735 feeding (t0), one, three, five hours after feeding started (t1, t3, t5).

736

737 **Figure 5. Dynamics and distribution of carbohydrate active enzymes (CAZymes) among the rumen**  
738 **microbiome.** Circles depict the quantified numbers of CAZyme transcripts ( $g^{-1}$  rumen fluid),  
739 summarized in respective to their activity (cellulases, hemicellulases, starch degrading enzymes and  
740 oligosaccharide hydrolases), separated for the major Bacteria and Eukarya involved in the breakdown  
741 of complex plant material (on phylum level and lowest common dominant taxon). Colour code  
742 indicate the different cows and the different time points (grey scale of the columns); before feeding  
743 (t0), one, three, five hours after feeding started (t1, t3, t5).

744

745 **Figure 6. Methane and methanogen transcript dynamics during plant biomass degradation.** (a)  
746 Methane emissions and quantified SSU rRNA transcripts of the two methanogen orders present in  
747 the rumen metatranscriptomes, *Methanomassiliicoccales* and *Methanobacteriales* (i.e.  
748 *Methanobrevibacter* and *Methanosphaera*), before feeding (t0) and one (t1), three (t3) and five (t5)  
749 hours after the feeding started. (b) Quantified *mcrA* (functional marker for all methanogens)  
750 transcripts. (c) Quantified *mtMA* (methylamine-specific methyltransferases) and *mtrA* transcripts  
751 (methyl- $H_4$ MPT:HS-CoM methyltransferase, alpha subunit), key transcripts in  
752 *Methanomassiliicoccales* and *Methanobrevibacter* specific methanogenesis, respectively. *mtMA*  
753 summarizes mono-, di- and trimethylamine-specific methyltransferase (*mtmB*, *mtbB* and *mttB*)  
754 transcripts, whereas *mttB* transcripts constitute to > 70 % of the *mtMA* transcripts. (d) Quantified  
755 *mtaB* (methanol-specific methyltransferase) transcripts. *Methanomassiliicoccales* and  
756 *Methanosphaera mtaB* transcripts are negatively and positively correlating with  $CH_4$  emissions,  
757 respectively. Mean of the four cows is shown for each time-point, error bars depict standard error of  
758 the mean (SEM). Asterisk indicate significant differences between the respective time-points and the  
759 previous one (\*  $p < 0.5$ , \*\*  $p < 0.01$ ).

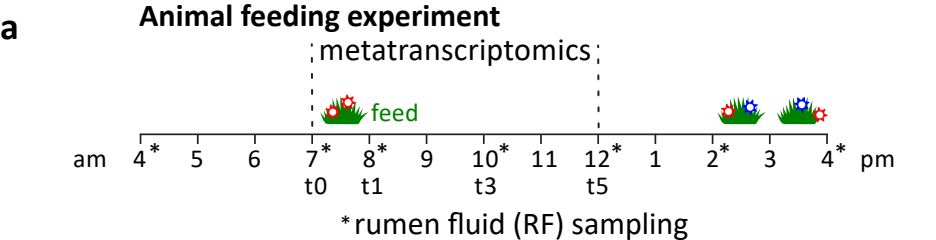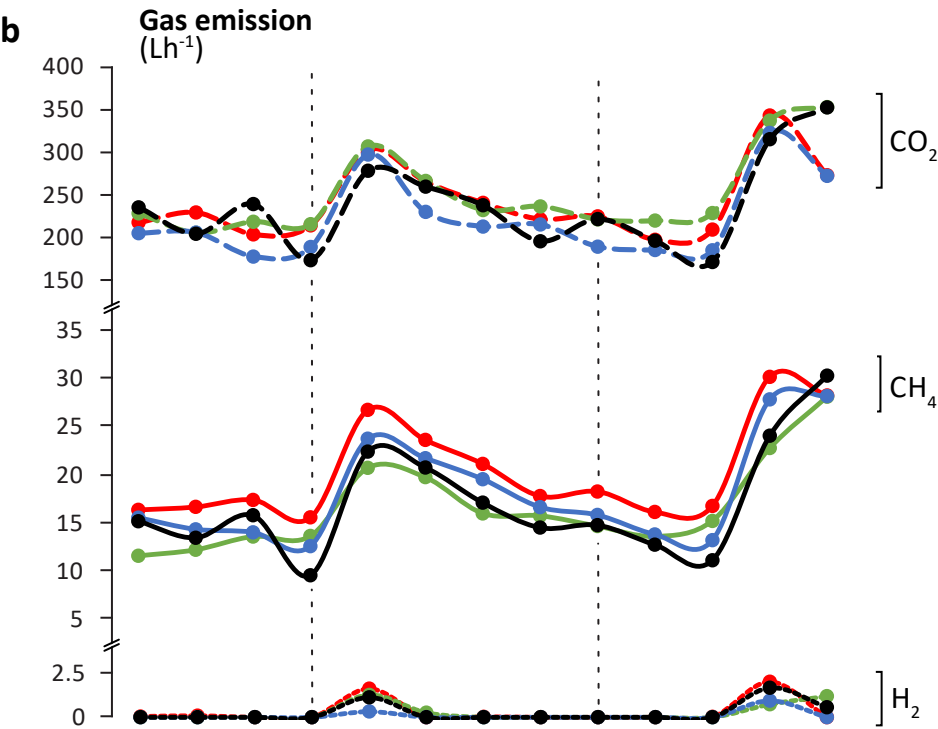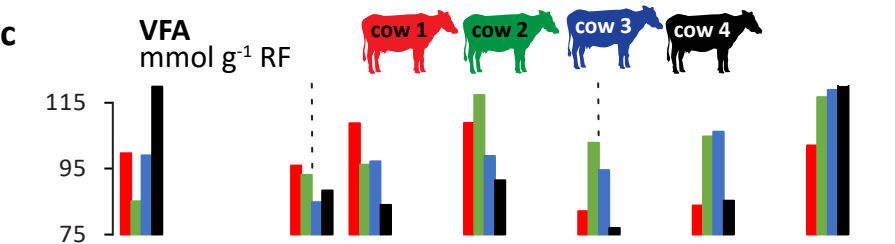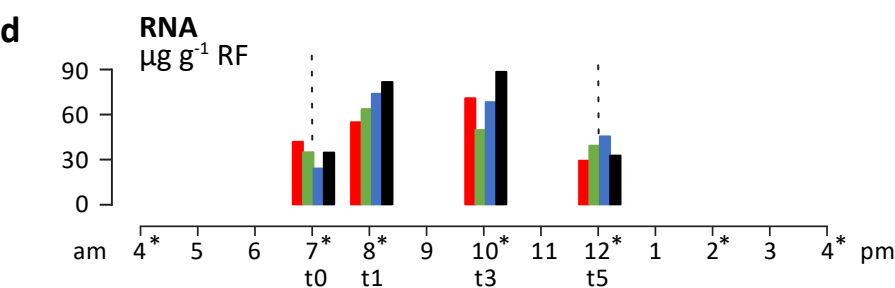

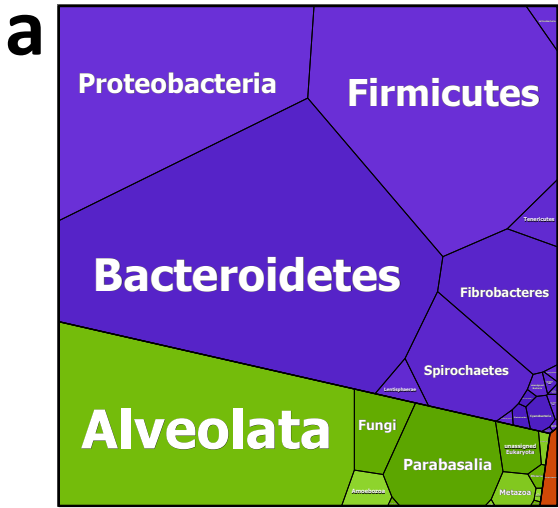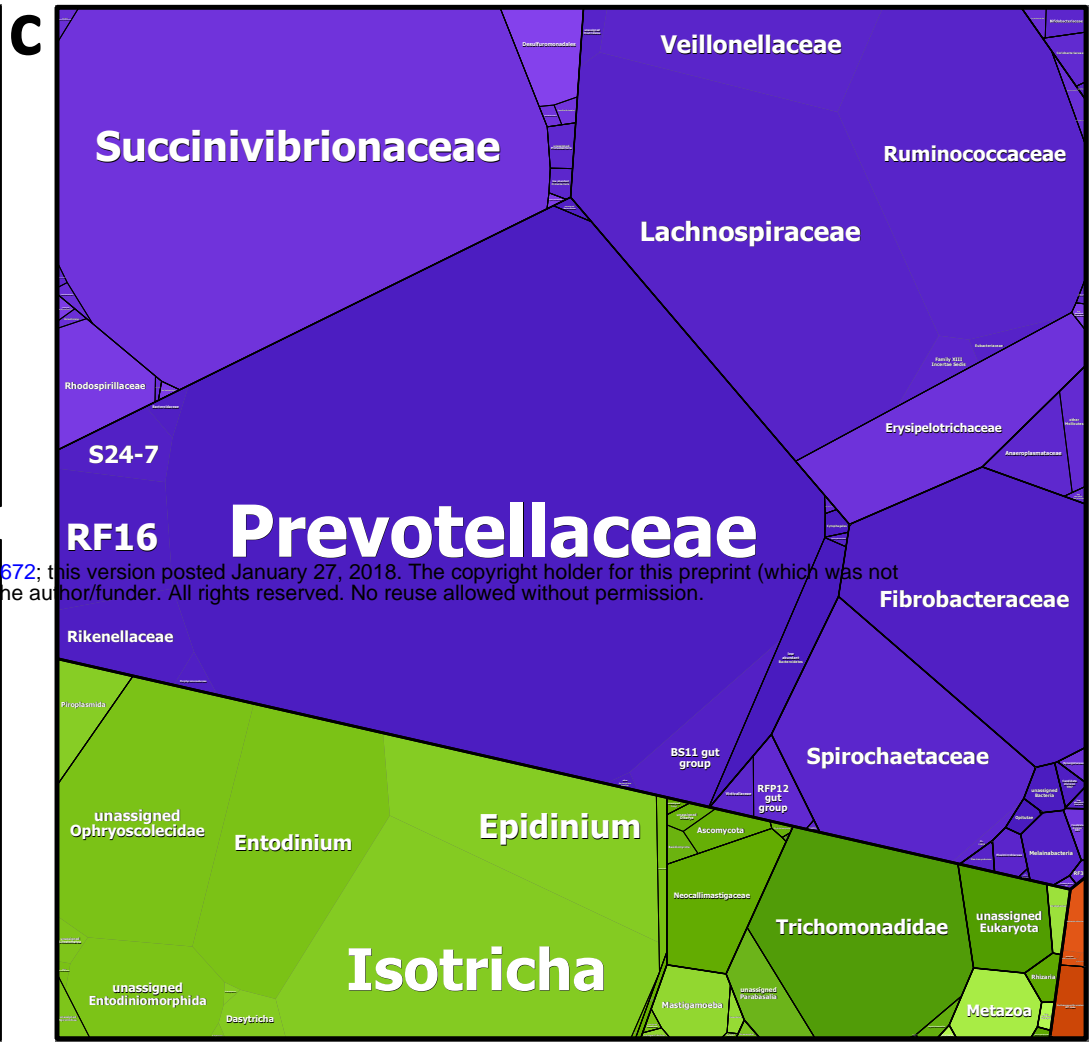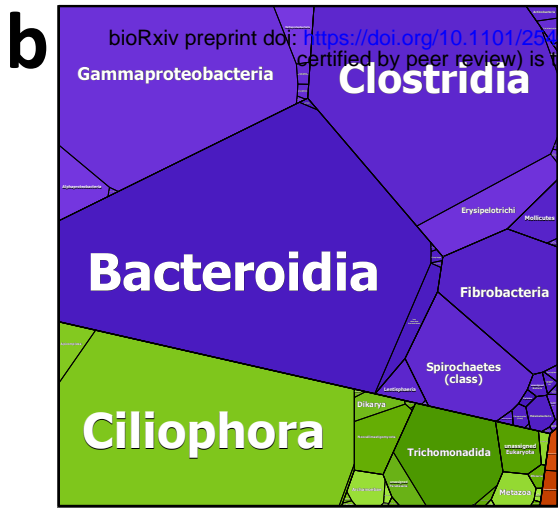

**d** ■ Eukaryota ■ Bacteria ■ Archaea

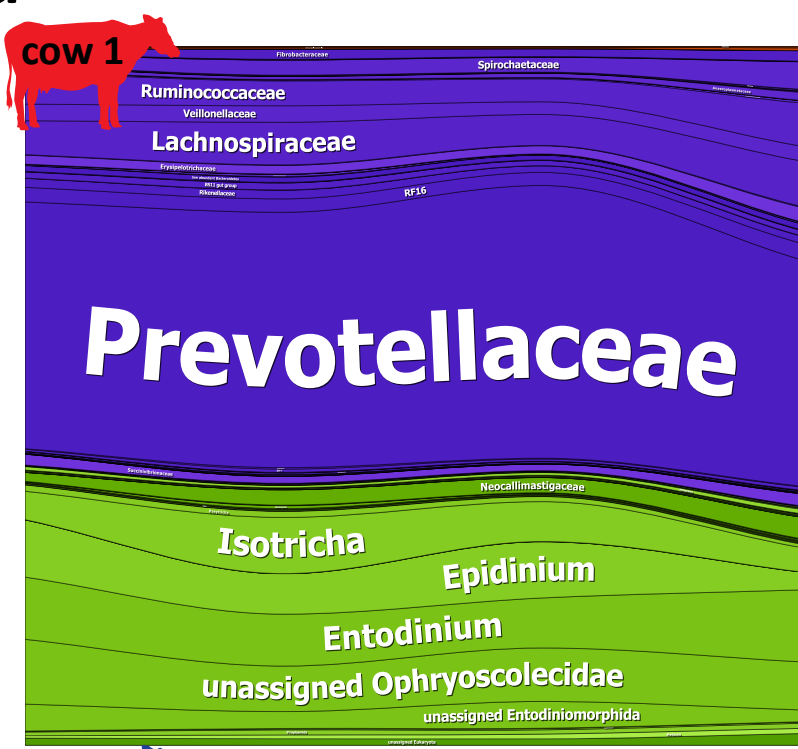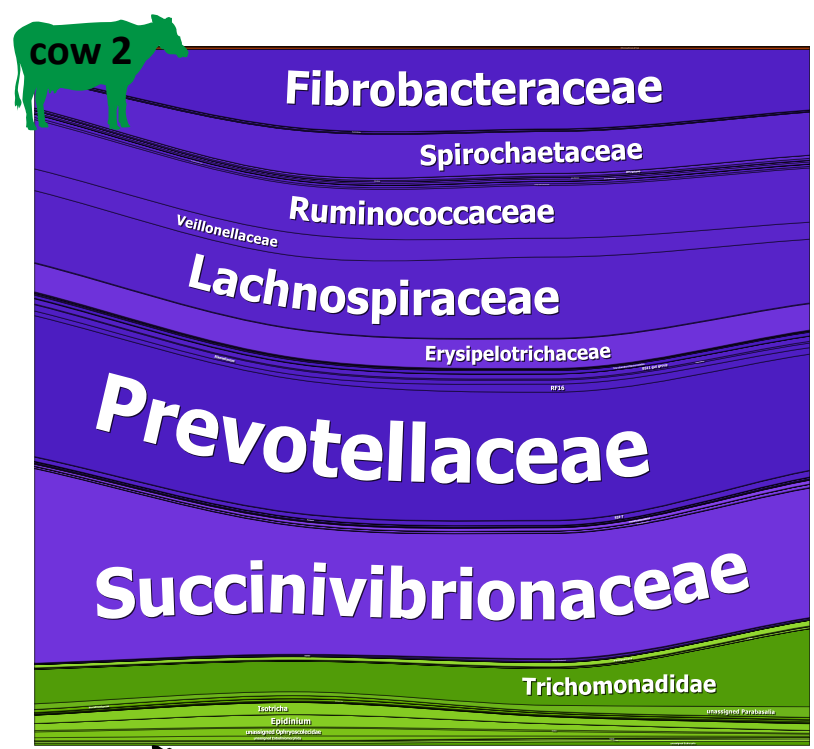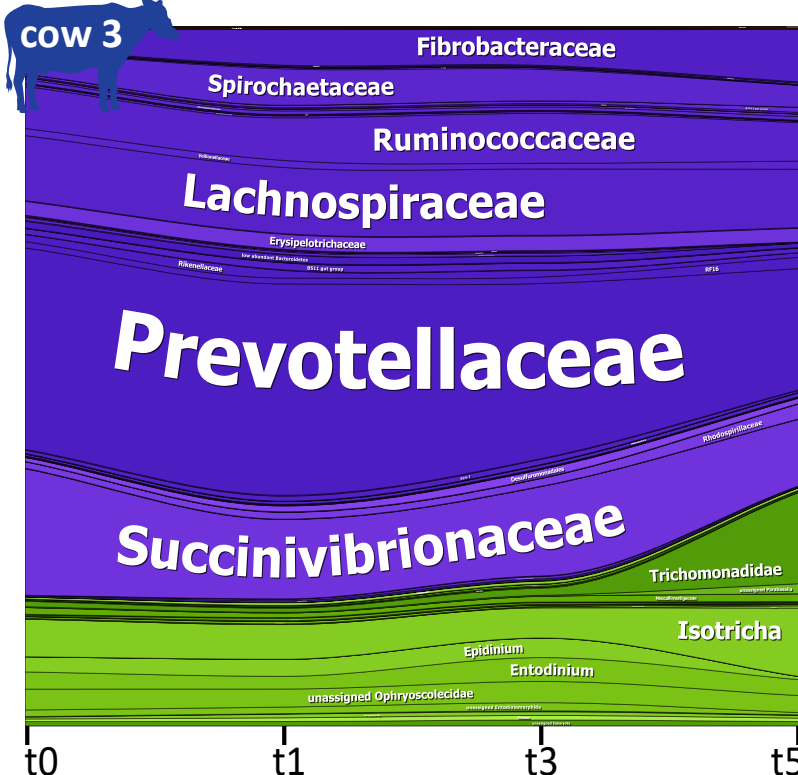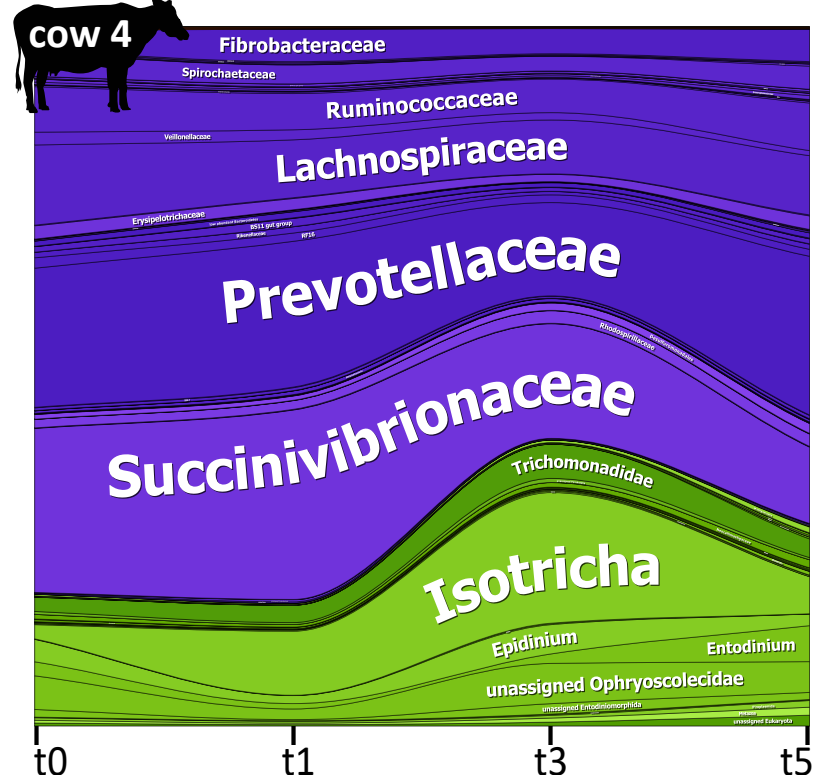

bioRxiv preprint doi: <https://doi.org/10.1101/251672>; this version posted January 27, 2018. The copyright holder for this preprint (which was not certified by peer review) is the author/funder. All rights reserved. No reuse allowed without permission.

t0 t1 t3 t5 t0 t1 t3 t5



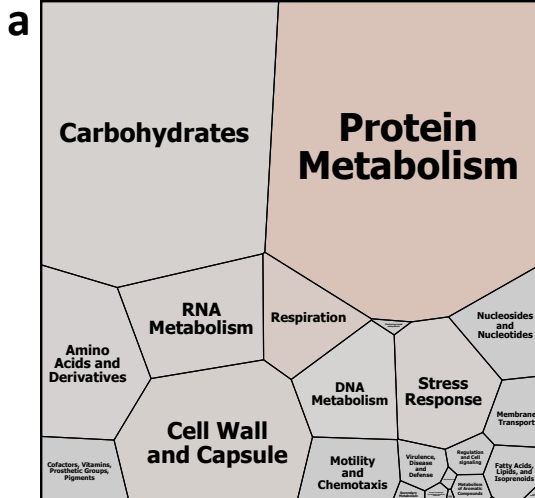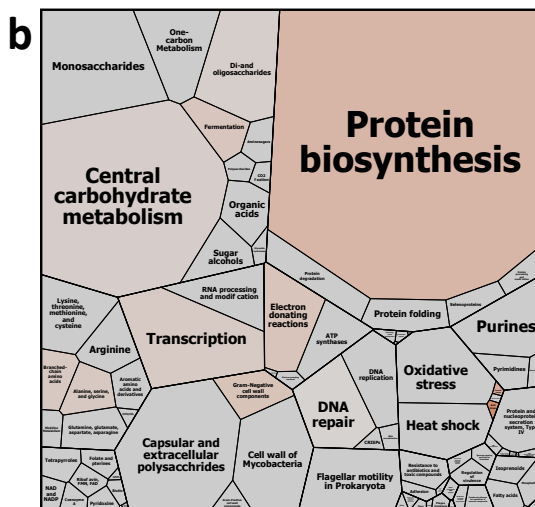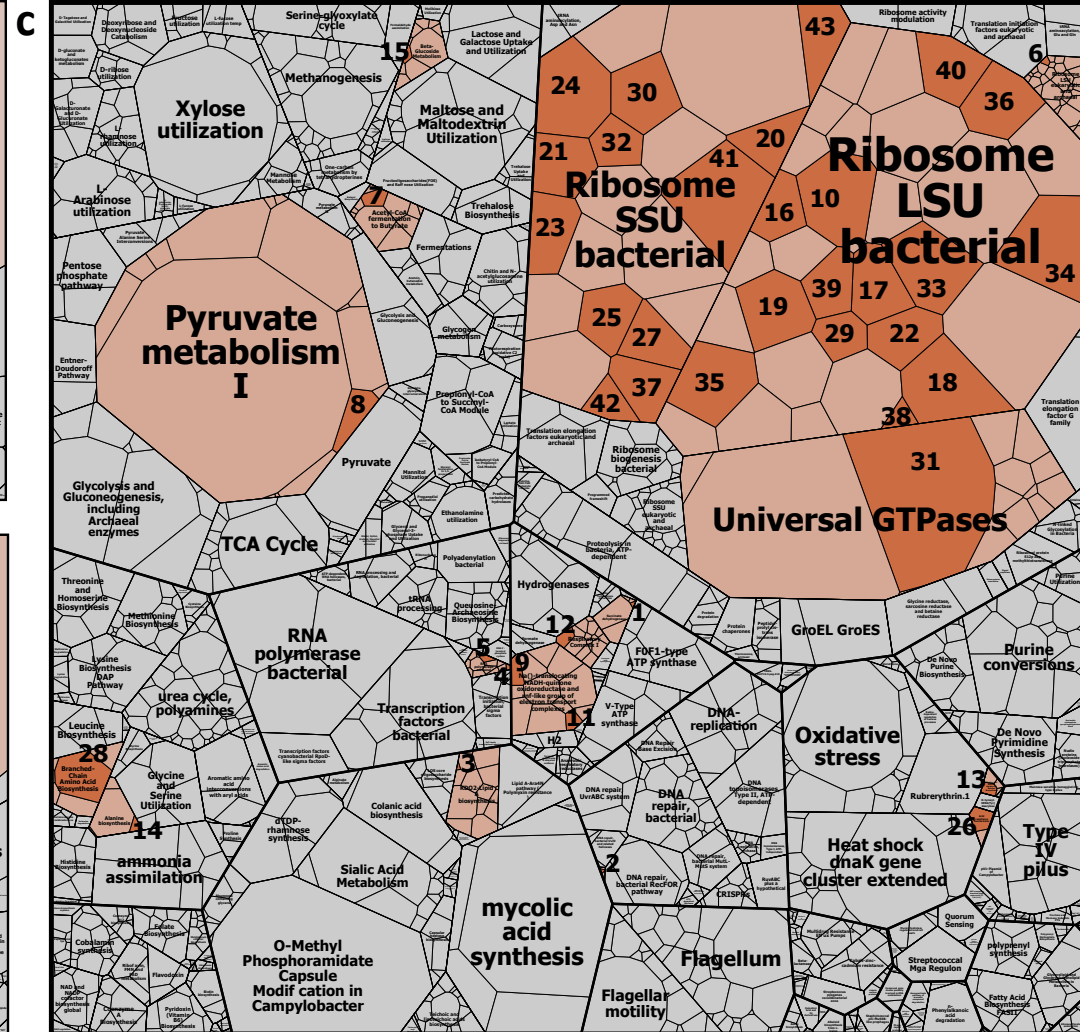

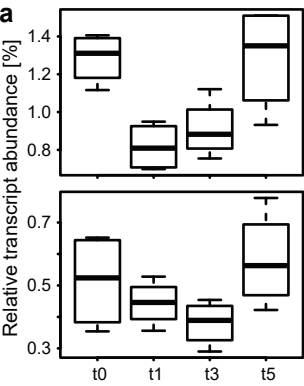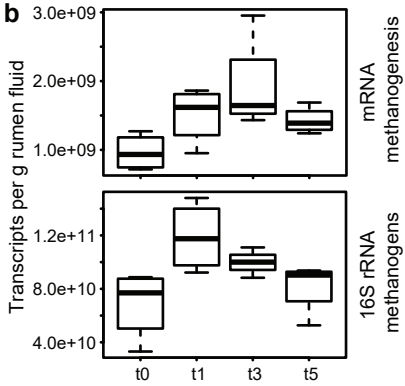

Taxa

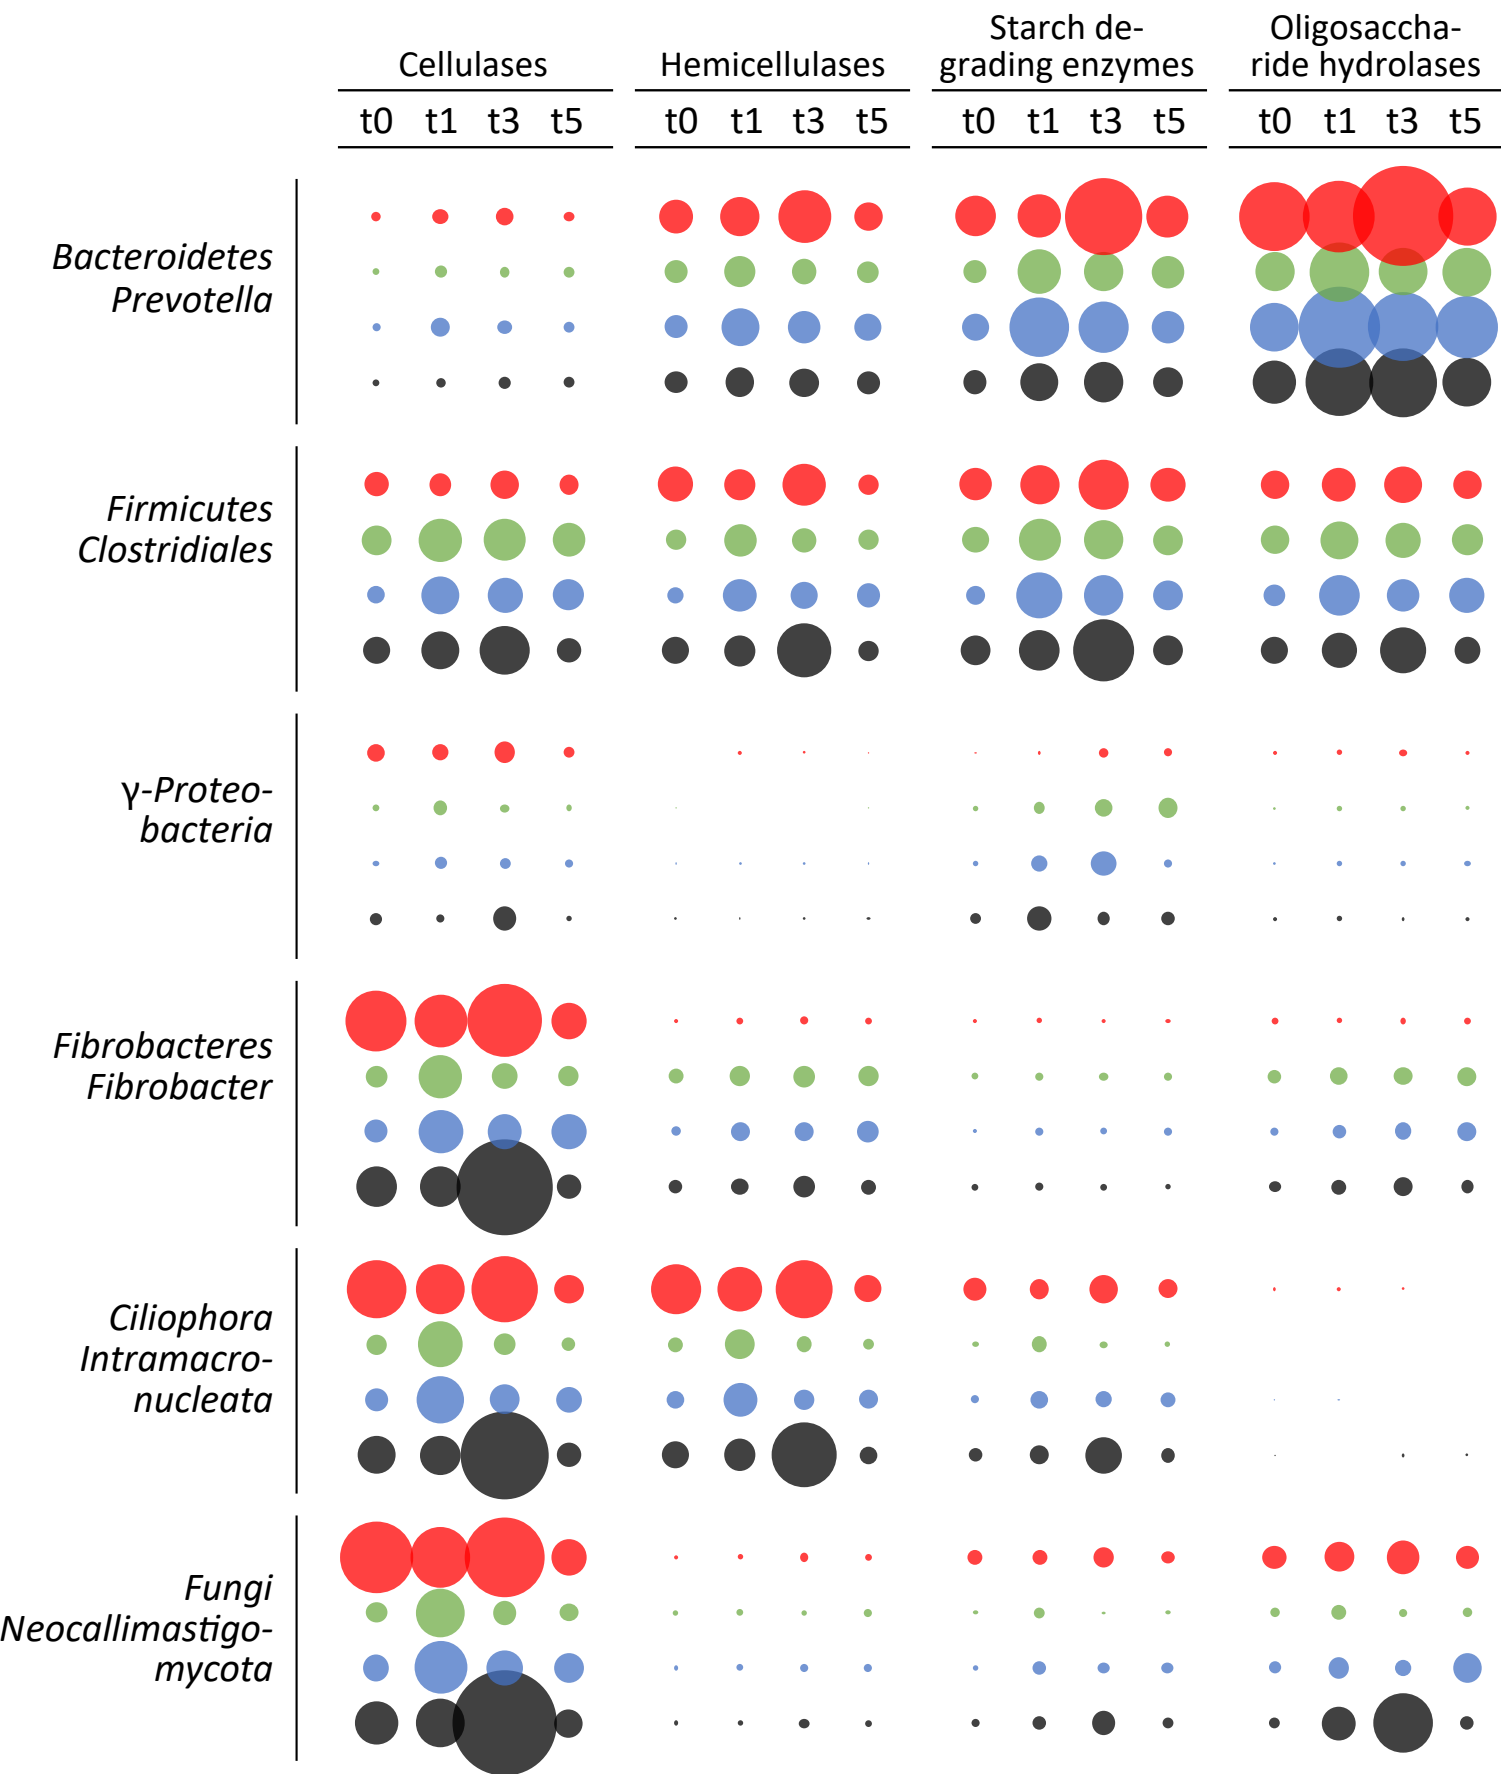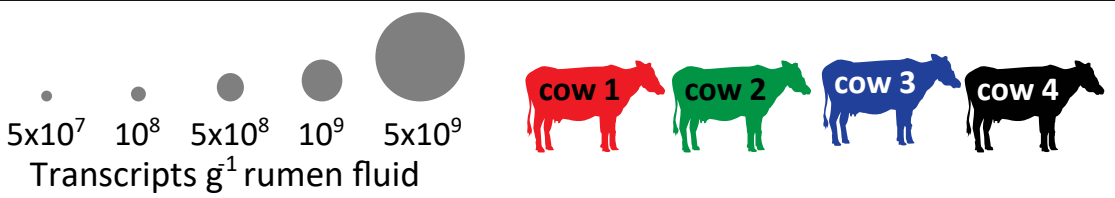

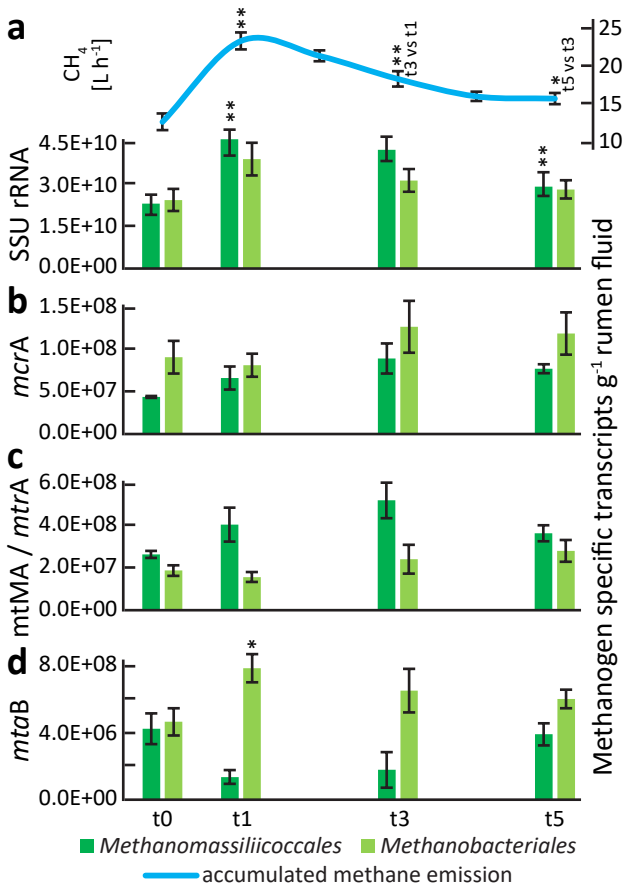

Source: https://biorxiv.org/content/biorxiv/early/2018/01/27/254672.full-text.pdf
